# Supplementary material for: Invasive stink bug favors naïve plants: Testing the role of plant geographic origin in diverse, managed environments
Source: PubMed Central journal article supplement (PMC5007670; doi:10.1038/srep32646), 2016-09-01
Supplement: srep32646-s1.pdf [file srep32646-s1.pdf]

**Invasive stink bug favors naïve plants: Testing the role of plant geographic origin in diverse, managed environments**

**Holly M. Martinson<sup>1</sup>, Erik J. Bergmann<sup>1</sup>, P. Dilip Venugopal<sup>1, 2, †</sup>, Christopher B. Riley<sup>3</sup>, Paula M. Shrewsbury<sup>1</sup>, and Michael J. Raupp<sup>1</sup>**

<sup>1</sup> Department of Entomology, University of Maryland, College Park, MD 20742

<sup>2</sup> AAAS S&T Policy Fellow, U.S. Environmental Protection Agency, Office of Air and Radiation, Office of Transportation & Air Quality, Washington DC 20460

<sup>3</sup> Department of Entomology, The Ohio State University, Columbus, OH 43210

\*Corresponding Author: [hmartinson@alumni.duke.edu](mailto:hmartinson@alumni.duke.edu)

† The views presented here are solely those of the authors and do not represent the views of either AAAS or the U.S. Government.

|    | Site           | Year | Plant Taxon                                 | Classification | Origin    | Egg masses per 1 min survey | Nymphs per 1 min survey | Adults per 1 min survey | <i>p</i> | <i>r</i> | <i>E*</i> |
|----|----------------|------|---------------------------------------------|----------------|-----------|-----------------------------|-------------------------|-------------------------|----------|----------|-----------|
| 1  | Raemelton Farm | 2011 | Abies koreana                               | Gymnosperm     | Asian     | 0                           | 0                       | 0.125                   | 0.0071   | 0.0026   | -0.4201   |
| 2  | Raemelton Farm | 2011 | Acer campestre Evelyn                       | Angiosperm     | Non Asian | 0.0333                      | 0.4833                  | 1.7667                  | 0.0089   | 0.0123   | 0.2078    |
| 3  | Raemelton Farm | 2011 | Acer davidii                                | Angiosperm     | Asian     | 0                           | 0                       | 0                       | 0.0006   | 0        | -1        |
| 4  | Raemelton Farm | 2011 | Acer griseum                                | Angiosperm     | Asian     | 0                           | 0.8167                  | 0.3                     | 0.0089   | 0.0088   | 0.0426    |
| 5  | Raemelton Farm | 2011 | Acer palmatum Bloodgood                     | Angiosperm     | Asian     | 0.0417                      | 0                       | 1.0417                  | 0.0036   | 0.0053   | 0.2405    |
| 6  | Raemelton Farm | 2011 | Acer palmatum Moonfire                      | Angiosperm     | Asian     | 0                           | 0                       | 0                       | 0.0018   | 0        | -1        |
| 7  | Raemelton Farm | 2011 | Acer palmatum Red Emperor                   | Angiosperm     | Asian     | 0.0455                      | 0                       | 0.2955                  | 0.0065   | 0.0035   | -0.2547   |
| 8  | Raemelton Farm | 2011 | Acer palmatum Sango Kaku                    | Angiosperm     | Asian     | 0                           | 0                       | 0                       | 0.0018   | 0        | -1        |
| 9  | Raemelton Farm | 2011 | Acer palmatum var. dissectum Crimson Queen  | Angiosperm     | Asian     | 0                           | 0                       | 0                       | 0.0036   | 0        | -1        |
| 10 | Raemelton Farm | 2011 | Acer pensylvanicum                          | Angiosperm     | Non Asian | 0.0313                      | 2                       | 0.5313                  | 0.0047   | 0.0053   | 0.1012    |
| 11 | Raemelton Farm | 2011 | Acer rubrum Bowhall                         | Angiosperm     | Non Asian | 0.0556                      | 5.6944                  | 0.4167                  | 0.0053   | 0.0079   | 0.2405    |
| 12 | Raemelton Farm | 2011 | Acer rubrum Brandywine                      | Angiosperm     | Non Asian | 0.0606                      | 2.9545                  | 0.553                   | 0.0195   | 0.0245   | 0.1618    |
| 13 | Raemelton Farm | 2011 | Acer rubrum Franksred                       | Angiosperm     | Non Asian | 0.1061                      | 2.7879                  | 0.6894                  | 0.0195   | 0.0237   | 0.144     |
| 14 | Raemelton Farm | 2011 | Acer rubrum October Glory                   | Angiosperm     | Non Asian | 0                           | 5.9167                  | 0.9722                  | 0.0053   | 0.0079   | 0.2405    |
| 15 | Raemelton Farm | 2011 | Acer rufinerve                              | Angiosperm     | Asian     | 0                           | 0                       | 0                       | 0.0018   | 0        | -1        |
| 16 | Raemelton Farm | 2011 | Acer saccharum Commemoration                | Angiosperm     | Non Asian | 0                           | 2                       | 0.0833                  | 0.0018   | 0.0026   | 0.2405    |
| 17 | Raemelton Farm | 2011 | Acer saccharum Green Mountain               | Angiosperm     | Non Asian | 0.0172                      | 2.2759                  | 0.3448                  | 0.0172   | 0.0193   | 0.1068    |
| 18 | Raemelton Farm | 2011 | Acer saccharum Legacy                       | Angiosperm     | Non Asian | 0.05                        | 2.475                   | 0.05                    | 0.0059   | 0.007    | 0.133     |
| 19 | Raemelton Farm | 2011 | Acer truncatum                              | Angiosperm     | Asian     | 0                           | 0                       | 0.1111                  | 0.0053   | 0.0018   | -0.4674   |
| 20 | Raemelton Farm | 2011 | Acer x freemanii Jeffersred                 | Angiosperm     | Non Asian | 0                           | 6.375                   | 0.6667                  | 0.0036   | 0.0053   | 0.2405    |
| 21 | Raemelton Farm | 2011 | Acer x tegmentosum White Tigress            | Angiosperm     | Asian     | 0                           | 1.8333                  | 0.0278                  | 0.0053   | 0.0053   | 0.0426    |
| 22 | Raemelton Farm | 2011 | Aesculus x carnea Briotii                   | Angiosperm     | Non Asian | 0                           | 0.0625                  | 0.3125                  | 0.0071   | 0.0061   | -0.0241   |
| 23 | Raemelton Farm | 2011 | Aesculus x carnea Fort McNair               | Angiosperm     | Non Asian | 0                           | 0.375                   | 0.9583                  | 0.0071   | 0.0079   | 0.1012    |
| 24 | Raemelton Farm | 2011 | Amelanchier x grandiflora Autumn Brilliance | Angiosperm     | Non Asian | 0                           | 1.1818                  | 0.4318                  | 0.0065   | 0.0079   | 0.144     |
| 25 | Raemelton Farm | 2011 | Amelanchier x grandiflora Princess Diana    | Angiosperm     | Non Asian | 0                           | 0.5417                  | 0.1458                  | 0.0071   | 0.0096   | 0.1991    |
| 26 | Raemelton Farm | 2011 | Betula nigra BNMTF                          | Angiosperm     | Non Asian | 0                           | 0.75                    | 0.5556                  | 0.0053   | 0.0053   | 0.0426    |
| 27 | Raemelton Farm | 2011 | Betula papyrifera Renci                     | Angiosperm     | Non Asian | 0.0278                      | 0.8333                  | 0.8056                  | 0.0053   | 0.0053   | 0.0426    |
| 28 | Raemelton Farm | 2011 | Carpinus betulus Fastigiata                 | Angiosperm     | Non Asian | 0.0259                      | 0.5                     | 0.1983                  | 0.0172   | 0.0149   | -0.0217   |
| 29 | Raemelton Farm | 2011 | Carpinus betulus Frans Fontaine             | Angiosperm     | Non Asian | 0                           | 0.1042                  | 0.4792                  | 0.0071   | 0.0061   | -0.0241   |
| 30 | Raemelton Farm | 2011 | Carya illinoensis Choctaw                   | Angiosperm     | Non Asian | 0                           | 0.5833                  | 4.6667                  | 0.0018   | 0.0026   | 0.2405    |
| 31 | Raemelton Farm | 2011 | Cedrus atlantica Glauca                     | Gymnosperm     | Non Asian | 0                           | 0                       | 0.0833                  | 0.0036   | 0.0018   | -0.2949   |
| 32 | Raemelton Farm | 2011 | Cedrus atlantica Kroh's Twisted             | Gymnosperm     | Non Asian | 0                           | 0                       | 0                       | 0.0018   | 0        | -1        |
| 33 | Raemelton Farm | 2011 | Cedrus deodara Shalimar                     | Gymnosperm     | Asian     | 0                           | 0                       | 0.25                    | 0.0036   | 0.0026   | -0.1009   |
| 34 | Raemelton Farm | 2011 | Celtis koraiensis                           | Angiosperm     | Asian     | 0                           | 0.0833                  | 0.5                     | 0.0018   | 0.0026   | 0.2405    |
| 35 | Raemelton Farm | 2011 | Cercidiphyllum japonicum                    | Angiosperm     | Asian     | 0.0167                      | 2.75                    | 0.7167                  | 0.0089   | 0.0088   | 0.0426    |
| 36 | Raemelton Farm | 2011 | Cercis canadensis                           | Angiosperm     | Non Asian | 0.0417                      | 1.5417                  | 0.4375                  | 0.0071   | 0.007    | 0.0426    |
| 37 | Raemelton Farm | 2011 | Cercis canadensis Alba                      | Angiosperm     | Non Asian | 0                           | 1.7917                  | 4.5833                  | 0.0036   | 0.0053   | 0.2405    |
| 38 | Raemelton Farm | 2011 | Cercis canadensis Appalachian Red           | Angiosperm     | Non Asian | 0.0833                      | 0.875                   | 0.4167                  | 0.0036   | 0.0035   | 0.0426    |
| 39 | Raemelton Farm | 2011 | Cercis canadensis Covey                     | Angiosperm     | Non Asian | 0                           | 1.1111                  | 0.0278                  | 0.0053   | 0.0053   | 0.0426    |
| 40 | Raemelton Farm | 2011 | Cercis canadensis Forest Pansy              | Angiosperm     | Non Asian | 0.0167                      | 1.1833                  | 1.3333                  | 0.0089   | 0.0088   | 0.0426    |
| 41 | Raemelton Farm | 2011 | Cercis canadensis Pink Heartbreaker         | Angiosperm     | Non Asian | 0                           | 2                       | 1.625                   | 0.0036   | 0.0053   | 0.2405    |
| 42 | Raemelton Farm | 2011 | Chamaecyparis nootkatensis Pendula          | Gymnosperm     | Non Asian | 0                           | 0                       | 0.9583                  | 0.0036   | 0.0035   | 0.0426    |

|    | Site           | Year | Plant Taxon                            | Classification | Origin    | Egg masses per 1 min survey | Nymphs per 1 min survey | Adults per 1 min survey | <i>p</i> | <i>r</i> | <i>E*</i> |
|----|----------------|------|----------------------------------------|----------------|-----------|-----------------------------|-------------------------|-------------------------|----------|----------|-----------|
| 43 | Raemelton Farm | 2011 | Chamaecyparis obtusa Crippsii          | Gymnosperm     | Asian     | 0                           | 0                       | 0                       | 0.0018   | 0        | -1        |
| 44 | Raemelton Farm | 2011 | Chionanthus retusus                    | Angiosperm     | Asian     | 0                           | 0                       | 0                       | 0.0018   | 0        | -1        |
| 45 | Raemelton Farm | 2011 | Cladrastis kentukea                    | Angiosperm     | Non Asian | 0.0833                      | 3.1481                  | 0.7963                  | 0.016    | 0.0219   | 0.204     |
| 46 | Raemelton Farm | 2011 | Cladrastis kentukea Perkins Pink       | Angiosperm     | Non Asian | 0.25                        | 3.75                    | 0.25                    | 0.0036   | 0.0044   | 0.153     |
| 47 | Raemelton Farm | 2011 | Cornus controversa                     | Angiosperm     | Asian     | 0                           | 0.0417                  | 0.375                   | 0.0036   | 0.0044   | 0.153     |
| 48 | Raemelton Farm | 2011 | Cornus florida                         | Angiosperm     | Non Asian | 0                           | 0.25                    | 0.75                    | 0.0018   | 0.0026   | 0.2405    |
| 49 | Raemelton Farm | 2011 | Cornus florida Appalachian Spring      | Angiosperm     | Non Asian | 0                           | 0.0833                  | 0                       | 0.0036   | 0.0009   | -0.572    |
| 50 | Raemelton Farm | 2011 | Cornus florida Cherokee Princess       | Angiosperm     | Non Asian | 0                           | 0.525                   | 0.3125                  | 0.0118   | 0.0079   | -0.1527   |
| 51 | Raemelton Farm | 2011 | Cornus florida Cloud 9                 | Angiosperm     | Non Asian | 0                           | 0.1667                  | 0.0833                  | 0.0036   | 0.0018   | -0.2949   |
| 52 | Raemelton Farm | 2011 | Cornus florida COMCO #1                | Angiosperm     | Non Asian | 0                           | 0.625                   | 0.3056                  | 0.0107   | 0.0096   | -0.0009   |
| 53 | Raemelton Farm | 2011 | Cornus florida Jean's Appalachian Snow | Angiosperm     | Non Asian | 0                           | 0.0417                  | 0.9583                  | 0.0036   | 0.0026   | -0.1009   |
| 54 | Raemelton Farm | 2011 | Cornus florida Kay's Appalachian Mist  | Angiosperm     | Non Asian | 0                           | 0.0417                  | 0.375                   | 0.0036   | 0.0026   | -0.1009   |
| 55 | Raemelton Farm | 2011 | Cornus florida x kousa Celestial       | Angiosperm     | Hybrid    | 0                           | 0                       | 0.5                     | 0.0018   | 0.0009   | -0.2949   |
| 56 | Raemelton Farm | 2011 | Cornus florida x kousa Constellation   | Angiosperm     | Hybrid    | 0                           | 0.875                   | 0.8125                  | 0.0024   | 0.0026   | 0.1012    |
| 57 | Raemelton Farm | 2011 | Cornus florida x kousa Stellar Pink    | Angiosperm     | Hybrid    | 0.0125                      | 0.375                   | 0.2625                  | 0.0118   | 0.0105   | -0.0101   |
| 58 | Raemelton Farm | 2011 | Cornus kousa Madison                   | Angiosperm     | Asian     | 0                           | 0                       | 0.25                    | 0.003    | 0.0026   | -0.0101   |
| 59 | Raemelton Farm | 2011 | Cornus kousa National                  | Angiosperm     | Asian     | 0                           | 0.3611                  | 0.1944                  | 0.0053   | 0.0053   | 0.0426    |
| 60 | Raemelton Farm | 2011 | Cornus kousa Radiant Rose              | Angiosperm     | Asian     | 0                           | 0                       | 0                       | 0.0006   | 0        | -1        |
| 61 | Raemelton Farm | 2011 | Cornus kousa Santomi                   | Angiosperm     | Asian     | 0                           | 0.2188                  | 0.125                   | 0.0142   | 0.0061   | -0.3546   |
| 62 | Raemelton Farm | 2011 | Cornus kousa var chinensis Milky Way   | Angiosperm     | Asian     | 0                           | 0.0417                  | 0                       | 0.0036   | 0.0009   | -0.572    |
| 63 | Raemelton Farm | 2011 | Cornus macrophylla                     | Angiosperm     | Asian     | 0.125                       | 1.7083                  | 0.7917                  | 0.0036   | 0.0053   | 0.2405    |
| 64 | Raemelton Farm | 2011 | Cornus officinalis                     | Angiosperm     | Asian     | 0                           | 0.125                   | 0.75                    | 0.0036   | 0.0044   | 0.153     |
| 65 | Raemelton Farm | 2011 | Cornus walteri                         | Angiosperm     | Non Asian | 0                           | 0                       | 1                       | 0.0018   | 0.0018   | 0.0426    |
| 66 | Raemelton Farm | 2011 | Crataegus crusgalli Cruzam             | Angiosperm     | Non Asian | 0                           | 0                       | 0.0833                  | 0.0018   | 0.0009   | -0.2949   |
| 67 | Raemelton Farm | 2011 | Crataegus laevigata Superba            | Angiosperm     | Non Asian | 0                           | 1.9167                  | 0.4167                  | 0.0018   | 0.0018   | 0.0426    |
| 68 | Raemelton Farm | 2011 | Crataegus phaenopyrum                  | Angiosperm     | Non Asian | 0                           | 0                       | 0.0833                  | 0.0018   | 0.0009   | -0.2949   |
| 69 | Raemelton Farm | 2011 | Crataegus viridis Winter King          | Angiosperm     | Non Asian | 0                           | 0.0833                  | 0.25                    | 0.0089   | 0.0061   | -0.1349   |
| 70 | Raemelton Farm | 2011 | Cryptomeria japonica Yoshino           | Gymnosperm     | Asian     | 0                           | 0                       | 1.6                     | 0.0089   | 0.0114   | 0.1721    |
| 71 | Raemelton Farm | 2011 | Ficus carica Chicago Hardy             | Angiosperm     | Non Asian | 0                           | 0.0833                  | 5                       | 0.0018   | 0.0026   | 0.2405    |
| 72 | Raemelton Farm | 2011 | Ginkgo biloba Autumn Gold              | Gymnosperm     | Asian     | 0.0139                      | 0                       | 0.2361                  | 0.0107   | 0.007    | -0.1588   |
| 73 | Raemelton Farm | 2011 | Ginkgo biloba Magyar                   | Gymnosperm     | Asian     | 0                           | 0                       | 0.7083                  | 0.0036   | 0.0035   | 0.0426    |
| 74 | Raemelton Farm | 2011 | Ginkgo biloba Princeton Sentry         | Gymnosperm     | Asian     | 0.1389                      | 1.3333                  | 0.0833                  | 0.0053   | 0.0044   | -0.0485   |
| 75 | Raemelton Farm | 2011 | Gleditsia triacanthos Shademaster      | Angiosperm     | Non Asian | 0.025                       | 1.1917                  | 1.9417                  | 0.0178   | 0.021    | 0.133     |
| 76 | Raemelton Farm | 2011 | Halesia tetraptera                     | Angiosperm     | Non Asian | 0.0417                      | 0.7222                  | 0.5556                  | 0.0107   | 0.0131   | 0.153     |
| 77 | Raemelton Farm | 2011 | Halesia tetraptera Arnold Pink         | Angiosperm     | Non Asian | 0                           | 0.1667                  | 0.4167                  | 0.0018   | 0.0018   | 0.0426    |
| 78 | Raemelton Farm | 2011 | Hamamelis x intermedia Arnold Promise  | Angiosperm     | Hybrid    | 0                           | 0                       | 0.375                   | 0.0036   | 0.0035   | 0.0426    |
| 79 | Raemelton Farm | 2011 | Hamamelis x intermedia Diane           | Angiosperm     | Hybrid    | 0                           | 0                       | 0.0833                  | 0.0018   | 0.0009   | -0.2949   |
| 80 | Raemelton Farm | 2011 | Hamamelis x intermedia Jelena          | Angiosperm     | Hybrid    | 0                           | 0                       | 0                       | 0.0018   | 0        | -1        |
| 81 | Raemelton Farm | 2011 | Hamamelis x intermedia Pallida         | Angiosperm     | Hybrid    | 0                           | 0                       | 0                       | 0.0018   | 0        | -1        |
| 82 | Raemelton Farm | 2011 | Heptacodium miconioides                | Angiosperm     | Asian     | 0                           | 0.1875                  | 0.2813                  | 0.0047   | 0.0044   | 0.0103    |
| 83 | Raemelton Farm | 2011 | Hibiscus syriacus Blue Bird            | Angiosperm     | Asian     | 0                           | 0.4167                  | 3.9167                  | 0.0018   | 0.0026   | 0.2405    |
| 84 | Raemelton Farm | 2011 | Hibiscus syriacus Diana                | Angiosperm     | Asian     | 0                           | 0.0833                  | 0.6667                  | 0.0018   | 0.0026   | 0.2405    |

|     | Site           | Year | Plant Taxon                            | Classification | Origin    | Egg masses per 1 min survey | Nymphs per 1 min survey | Adults per 1 min survey | <i>p</i> | <i>r</i> | <i>E*</i> |
|-----|----------------|------|----------------------------------------|----------------|-----------|-----------------------------|-------------------------|-------------------------|----------|----------|-----------|
| 85  | Raemelton Farm | 2011 | Hibiscus syriacus Red Heart            | Angiosperm     | Asian     | 0                           | 2.2083                  | 2.875                   | 0.0036   | 0.0053   | 0.2405    |
| 86  | Raemelton Farm | 2011 | Hibiscus syriacus Satin Blue           | Angiosperm     | Asian     | 0                           | 1                       | 4.8333                  | 0.0036   | 0.0053   | 0.2405    |
| 87  | Raemelton Farm | 2011 | Hibiscus syriacus Satin Rose           | Angiosperm     | Asian     | 0                           | 1                       | 0.625                   | 0.0012   | 0.0018   | 0.2405    |
| 88  | Raemelton Farm | 2011 | Hibiscus syriacus White Chiffon        | Angiosperm     | Asian     | 0                           | 0.25                    | 0                       | 0.0006   | 0.0009   | 0.2405    |
| 89  | Raemelton Farm | 2011 | Ilex opaca Jersey Princess             | Angiosperm     | Non Asian | 0                           | 0.3333                  | 0                       | 0.0018   | 0.0018   | 0.0426    |
| 90  | Raemelton Farm | 2011 | Koelreuteria paniculata                | Angiosperm     | Asian     | 0.0484                      | 1.4839                  | 1.5081                  | 0.0184   | 0.0237   | 0.1745    |
| 91  | Raemelton Farm | 2011 | Larix leptolepis                       | Gymnosperm     | Asian     | 0                           | 0                       | 0.125                   | 0.0012   | 0.0009   | -0.1009   |
| 92  | Raemelton Farm | 2011 | Liquidambar styraciflua                | Angiosperm     | Non Asian | 0.125                       | 2.6667                  | 1.7917                  | 0.0036   | 0.0053   | 0.2405    |
| 93  | Raemelton Farm | 2011 | Liquidambar styraciflua Hapdell        | Angiosperm     | Non Asian | 0                           | 0                       | 1.25                    | 0.0018   | 0.0026   | 0.2405    |
| 94  | Raemelton Farm | 2011 | Liquidambar styraciflua Moraine        | Angiosperm     | Non Asian | 0.0417                      | 0.5972                  | 0.5694                  | 0.0107   | 0.014    | 0.1843    |
| 95  | Raemelton Farm | 2011 | Liquidambar styraciflua Rotundiloba    | Angiosperm     | Non Asian | 0.0833                      | 0                       | 0                       | 0.0018   | 0.0009   | -0.2949   |
| 96  | Raemelton Farm | 2011 | Magnolia liliiflora x stellata Ann     | Angiosperm     | Asian     | 0                           | 0                       | 0.4167                  | 0.0018   | 0.0026   | 0.2405    |
| 97  | Raemelton Farm | 2011 | Magnolia liliiflora x stellata Merrill | Angiosperm     | Asian     | 0                           | 0                       | 0.1667                  | 0.0018   | 0.0009   | -0.2949   |
| 98  | Raemelton Farm | 2011 | Magnolia x loebneri Leonard Messel     | Angiosperm     | Asian     | 0                           | 0                       | 0.0833                  | 0.0018   | 0.0009   | -0.2949   |
| 99  | Raemelton Farm | 2011 | Malus baccata Jackii                   | Angiosperm     | Asian     | 0                           | 0.4167                  | 0                       | 0.0018   | 0.0018   | 0.0426    |
| 100 | Raemelton Farm | 2011 | Malus domestica Freedom                | Angiosperm     | unknown   | 0                           | 0.4583                  | 2.3542                  | 0.0071   | 0.0096   | 0.1991    |
| 101 | Raemelton Farm | 2011 | Malus domestica Liberty                | Angiosperm     | unknown   | 0                           | 0.1944                  | 1.5278                  | 0.0107   | 0.0149   | 0.2134    |
| 102 | Raemelton Farm | 2011 | Malus Donald Wyman                     | Angiosperm     | unknown   | 0.0119                      | 1.1786                  | 2.0595                  | 0.0124   | 0.0184   | 0.2405    |
| 103 | Raemelton Farm | 2011 | Malus halliana Adirondack              | Angiosperm     | Asian     | 0.0238                      | 0.3214                  | 0.9167                  | 0.0124   | 0.0175   | 0.2174    |
| 104 | Raemelton Farm | 2011 | Malus Mary Potter                      | Angiosperm     | Asian     | 0                           | 1.2917                  | 0.0417                  | 0.0036   | 0.0035   | 0.0426    |
| 105 | Raemelton Farm | 2011 | Malus Molten Lava                      | Angiosperm     | unknown   | 0.0357                      | 0.6667                  | 1.7738                  | 0.0124   | 0.0175   | 0.2174    |
| 106 | Raemelton Farm | 2011 | Malus Pink Princess                    | Angiosperm     | unknown   | 0.0208                      | 0.1042                  | 0.9792                  | 0.0071   | 0.0088   | 0.153     |
| 107 | Raemelton Farm | 2011 | Malus Prairifire                       | Angiosperm     | unknown   | 0.037                       | 0.7407                  | 0.7222                  | 0.016    | 0.0228   | 0.2227    |
| 108 | Raemelton Farm | 2011 | Malus sargentii Select A               | Angiosperm     | Asian     | 0.0208                      | 1.2708                  | 0.5521                  | 0.0142   | 0.0202   | 0.2204    |
| 109 | Raemelton Farm | 2011 | Malus x zumi Calocarpa                 | Angiosperm     | Asian     | 0.0238                      | 1.7738                  | 1.2262                  | 0.0124   | 0.0184   | 0.2405    |
| 110 | Raemelton Farm | 2011 | Metasequoia glyptostroboides           | Gymnosperm     | Asian     | 0                           | 0.4167                  | 0.8056                  | 0.0053   | 0.0053   | 0.0426    |
| 111 | Raemelton Farm | 2011 | Nyssa sylvatica                        | Angiosperm     | Non Asian | 0.0417                      | 0.3333                  | 0.5833                  | 0.0036   | 0.0044   | 0.153     |
| 112 | Raemelton Farm | 2011 | Nyssa sylvatica Tupelo Tower           | Angiosperm     | Non Asian | 0                           | 2                       | 0.0833                  | 0.0018   | 0.0026   | 0.2405    |
| 113 | Raemelton Farm | 2011 | Nyssa sylvatica Wildfire               | Angiosperm     | Non Asian | 0                           | 0.25                    | 1.25                    | 0.0036   | 0.0053   | 0.2405    |
| 114 | Raemelton Farm | 2011 | Oxydendrum arboreum                    | Angiosperm     | Non Asian | 0.1667                      | 0                       | 0.4167                  | 0.0018   | 0.0026   | 0.2405    |
| 115 | Raemelton Farm | 2011 | Parrotia persica                       | Angiosperm     | Non Asian | 0                           | 0.3472                  | 0.1389                  | 0.0107   | 0.0053   | -0.2949   |
| 116 | Raemelton Farm | 2011 | Parrotia persica Vanessa               | Angiosperm     | Non Asian | 0                           | 0                       | 1.1667                  | 0.0018   | 0.0018   | 0.0426    |
| 117 | Raemelton Farm | 2011 | Picea omorika                          | Gymnosperm     | Non Asian | 0                           | 0                       | 0.0859                  | 0.0189   | 0.0061   | -0.4735   |
| 118 | Raemelton Farm | 2011 | Picea omorika Pendula                  | Gymnosperm     | Non Asian | 0                           | 0                       | 0                       | 0.0036   | 0        | -1        |
| 119 | Raemelton Farm | 2011 | Picea orientalis Atravirens            | Gymnosperm     | Non Asian | 0                           | 0                       | 0                       | 0.0018   | 0        | -1        |
| 120 | Raemelton Farm | 2011 | Picea orientalis Aurea Compacta        | Gymnosperm     | Non Asian | 0                           | 0                       | 0.2917                  | 0.0036   | 0.0026   | -0.1009   |
| 121 | Raemelton Farm | 2011 | Picea orientalis Gracillis             | Gymnosperm     | Non Asian | 0                           | 0                       | 0.0417                  | 0.0036   | 0.0009   | -0.572    |
| 122 | Raemelton Farm | 2011 | Picea pungens Fat Albert               | Gymnosperm     | Non Asian | 0                           | 0                       | 0                       | 0.0012   | 0        | -1        |
| 123 | Raemelton Farm | 2011 | Picea pungens Glauca                   | Gymnosperm     | Non Asian | 0                           | 0                       | 0                       | 0.0024   | 0        | -1        |
| 124 | Raemelton Farm | 2011 | Picea pungens Glauca Fastigata         | Gymnosperm     | Non Asian | 0                           | 0                       | 0.375                   | 0.0012   | 0.0009   | -0.1009   |
| 125 | Raemelton Farm | 2011 | Picea pungens Glauca Majestic Blue     | Gymnosperm     | Non Asian | 0                           | 0                       | 0                       | 0.0018   | 0        | -1        |
| 126 | Raemelton Farm | 2011 | Picea pungens Glauca Van Sikes         | Gymnosperm     | Non Asian | 0                           | 0                       | 0                       | 0.013    | 0        | -1        |

|     | Site           | Year | Plant Taxon                            | Classification | Origin    | Egg masses per 1 min survey | Nymphs per 1 min survey | Adults per 1 min survey | <i>p</i> | <i>r</i> | <i>E*</i> |
|-----|----------------|------|----------------------------------------|----------------|-----------|-----------------------------|-------------------------|-------------------------|----------|----------|-----------|
| 127 | Raemelton Farm | 2011 | Picea pungens Hoopsii                  | Gymnosperm     | Non Asian | 0                           | 0                       | 0                       | 0.0059   | 0        | -1        |
| 128 | Raemelton Farm | 2011 | Pinus cembra Silver Sheen              | Gymnosperm     | Non Asian | 0                           | 0.0833                  | 2.8333                  | 0.0018   | 0.0026   | 0.2405    |
| 129 | Raemelton Farm | 2011 | Pinus flexilis Vanderwolf's Pyramid    | Gymnosperm     | Non Asian | 0                           | 0                       | 0.875                   | 0.0036   | 0.0053   | 0.2405    |
| 130 | Raemelton Farm | 2011 | Pinus koraiensis Morris Blue           | Gymnosperm     | Asian     | 0                           | 0                       | 0                       | 0.0036   | 0        | -1        |
| 131 | Raemelton Farm | 2011 | Pinus wallichiana                      | Gymnosperm     | Asian     | 0                           | 0                       | 0.0833                  | 0.0036   | 0.0018   | -0.2949   |
| 132 | Raemelton Farm | 2011 | Platanus x acerifolia Bloodgood        | Angiosperm     | Non Asian | 0.0741                      | 3.0185                  | 1.2222                  | 0.016    | 0.0202   | 0.1637    |
| 133 | Raemelton Farm | 2011 | Platanus x acerifolia Yarwood          | Angiosperm     | Non Asian | 0.0833                      | 0.0833                  | 0.0833                  | 0.0018   | 0.0018   | 0.0426    |
| 134 | Raemelton Farm | 2011 | Prunus cerasifera Cripoizam            | Angiosperm     | Non Asian | 0.0278                      | 0.1111                  | 1.6944                  | 0.0053   | 0.0053   | 0.0426    |
| 135 | Raemelton Farm | 2011 | Prunus cerasifera Thundercloud         | Angiosperm     | Non Asian | 0.0156                      | 0                       | 0.4375                  | 0.0095   | 0.0044   | -0.3241   |
| 136 | Raemelton Farm | 2011 | Prunus cerasus Montmorency             | Angiosperm     | Non Asian | 0                           | 0.5833                  | 0.5833                  | 0.0018   | 0.0018   | 0.0426    |
| 137 | Raemelton Farm | 2011 | Prunus mume                            | Angiosperm     | Asian     | 0                           | 0                       | 0.0833                  | 0.0018   | 0.0009   | -0.2949   |
| 138 | Raemelton Farm | 2011 | Prunus persica Red Haven               | Angiosperm     | Asian     | 0                           | 0.2083                  | 3.0625                  | 0.0071   | 0.0105   | 0.2405    |
| 139 | Raemelton Farm | 2011 | Prunus sargentii                       | Angiosperm     | Asian     | 0                           | 0.0556                  | 0.1944                  | 0.0053   | 0.0044   | -0.0485   |
| 140 | Raemelton Farm | 2011 | Prunus serrulata Kwanzan               | Angiosperm     | Asian     | 0.0278                      | 2.4722                  | 1.4444                  | 0.0053   | 0.007    | 0.1843    |
| 141 | Raemelton Farm | 2011 | Prunus serrulata Snowgoose             | Angiosperm     | Asian     | 0                           | 0.0417                  | 0.2917                  | 0.0071   | 0.0044   | -0.19     |
| 142 | Raemelton Farm | 2011 | Prunus subhirtella Pendula             | Angiosperm     | Asian     | 0.0556                      | 0.0833                  | 0.6389                  | 0.0053   | 0.0044   | -0.0485   |
| 143 | Raemelton Farm | 2011 | Prunus subhirtella Pishshzam           | Angiosperm     | Asian     | 0                           | 0                       | 0                       | 0.0018   | 0        | -1        |
| 144 | Raemelton Farm | 2011 | Prunus x incam Okame                   | Angiosperm     | Asian     | 0                           | 0.7083                  | 0.5                     | 0.0071   | 0.007    | 0.0426    |
| 145 | Raemelton Farm | 2011 | Pseudocycdonia sinensis                | Angiosperm     | Asian     | 0.0417                      | 0.5417                  | 0.25                    | 0.0036   | 0.0053   | 0.2405    |
| 146 | Raemelton Farm | 2011 | Pyrus communis Sunrise                 | Angiosperm     | Non Asian | 0                           | 0.25                    | 0.9167                  | 0.0018   | 0.0018   | 0.0426    |
| 147 | Raemelton Farm | 2011 | Pyrus fauriei Westwood                 | Angiosperm     | Asian     | 0.0833                      | 1                       | 0.0833                  | 0.0018   | 0.0026   | 0.2405    |
| 148 | Raemelton Farm | 2011 | Quercus acutissima                     | Angiosperm     | Asian     | 0                           | 0                       | 0.0833                  | 0.0018   | 0.0009   | -0.2949   |
| 149 | Raemelton Farm | 2011 | Quercus alba                           | Angiosperm     | Non Asian | 0.0278                      | 0.4444                  | 0.6389                  | 0.0053   | 0.0044   | -0.0485   |
| 150 | Raemelton Farm | 2011 | Quercus coccinea                       | Angiosperm     | Non Asian | 0                           | 0.0556                  | 0.1111                  | 0.0107   | 0.0061   | -0.2231   |
| 151 | Raemelton Farm | 2011 | Quercus robur Regal Prince             | Angiosperm     | Non Asian | 0.0882                      | 2.6324                  | 0.5147                  | 0.0101   | 0.0131   | 0.1808    |
| 152 | Raemelton Farm | 2011 | Quercus rubra                          | Angiosperm     | Non Asian | 0.0083                      | 0.25                    | 0.525                   | 0.0178   | 0.0167   | 0.017     |
| 153 | Raemelton Farm | 2011 | Rhus typhina Baittiger                 | Angiosperm     | Non Asian | 0                           | 0                       | 0.2917                  | 0.0036   | 0.0026   | -0.1009   |
| 154 | Raemelton Farm | 2011 | Sambucus nigra Eva                     | Angiosperm     | Non Asian | 0                           | 0                       | 0                       | 0.0036   | 0        | -1        |
| 155 | Raemelton Farm | 2011 | Sophora japonica Regent                | Angiosperm     | Asian     | 0.0167                      | 1.4083                  | 1.225                   | 0.0178   | 0.0228   | 0.1721    |
| 156 | Raemelton Farm | 2011 | Stewartia koreana                      | Angiosperm     | Asian     | 0                           | 0.075                   | 0.375                   | 0.0059   | 0.0035   | -0.2096   |
| 157 | Raemelton Farm | 2011 | Stewartia pseudocamellia               | Angiosperm     | Asian     | 0.0357                      | 0.2857                  | 0.5357                  | 0.0083   | 0.0105   | 0.1667    |
| 158 | Raemelton Farm | 2011 | Styrax japonicus                       | Angiosperm     | Asian     | 0.0185                      | 0.3241                  | 0.1111                  | 0.016    | 0.0131   | -0.0485   |
| 159 | Raemelton Farm | 2011 | Syringa pekinensis Morton              | Angiosperm     | Asian     | 0                           | 0.2667                  | 13.9                    | 0.0089   | 0.0131   | 0.2405    |
| 160 | Raemelton Farm | 2011 | Syringa pekinensis Zhang Zhiming       | Angiosperm     | Asian     | 0.0278                      | 0.7778                  | 4.6944                  | 0.0053   | 0.0079   | 0.2405    |
| 161 | Raemelton Farm | 2011 | Taxus x media Hatfeldii                | Gymnosperm     | Hybrid    | 0                           | 0                       | 0.8333                  | 0.0018   | 0.0018   | 0.0426    |
| 162 | Raemelton Farm | 2011 | Taxus x media Hicksii                  | Gymnosperm     | Hybrid    | 0                           | 0                       | 0.1667                  | 0.0018   | 0.0009   | -0.2949   |
| 163 | Raemelton Farm | 2011 | Tetradium daniellii                    | Angiosperm     | Asian     | 0.2083                      | 1.5                     | 1.5417                  | 0.0071   | 0.0105   | 0.2405    |
| 164 | Raemelton Farm | 2011 | Thuja plicata Emerald Cone             | Gymnosperm     | Non Asian | 0                           | 0                       | 0                       | 0.0018   | 0        | -1        |
| 165 | Raemelton Farm | 2011 | Thuja plicata Zebrina                  | Gymnosperm     | Non Asian | 0                           | 0                       | 0                       | 0.0018   | 0        | -1        |
| 166 | Raemelton Farm | 2011 | Thuja standishii x plicata Green Giant | Gymnosperm     | Hybrid    | 0                           | 0                       | 0.5833                  | 0.0071   | 0.007    | 0.0426    |
| 167 | Raemelton Farm | 2011 | Tilia cordata Greenspire               | Angiosperm     | Non Asian | 0.0577                      | 1.25                    | 0.3654                  | 0.0077   | 0.0096   | 0.1604    |
| 168 | Raemelton Farm | 2011 | Tilia tomentosa Sterling               | Angiosperm     | Non Asian | 0.125                       | 1.8958                  | 0.3958                  | 0.0071   | 0.0096   | 0.1991    |

|     | Site           | Year | Plant Taxon                                 | Classification | Origin    | Egg masses per 1 min survey | Nymphs per 1 min survey | Adults per 1 min survey | <i>p</i> | <i>r</i> | <i>E*</i> |
|-----|----------------|------|---------------------------------------------|----------------|-----------|-----------------------------|-------------------------|-------------------------|----------|----------|-----------|
| 169 | Raemelton Farm | 2011 | Ulmus americana Princeton                   | Angiosperm     | Non Asian | 0.0833                      | 2.5119                  | 0.8929                  | 0.0124   | 0.0167   | 0.1929    |
| 170 | Raemelton Farm | 2011 | Ulmus americana Valley Forge                | Angiosperm     | Non Asian | 0.0972                      | 2.9583                  | 1.0278                  | 0.0107   | 0.0158   | 0.2405    |
| 171 | Raemelton Farm | 2011 | Ulmus parvifolia Emer I                     | Angiosperm     | Asian     | 0                           | 0.4444                  | 0.1111                  | 0.0053   | 0.0026   | -0.2949   |
| 172 | Raemelton Farm | 2011 | Ulmus parvifolia Emer II                    | Angiosperm     | Asian     | 0                           | 0.2708                  | 0.625                   | 0.0071   | 0.0079   | 0.1012    |
| 173 | Raemelton Farm | 2011 | Viburnum carlesii Cayuga                    | Angiosperm     | Asian     | 0                           | 0                       | 0.0833                  | 0.0018   | 0.0009   | -0.2949   |
| 174 | Raemelton Farm | 2011 | Xanthoceras sorbifolia                      | Angiosperm     | Asian     | 0                           | 0                       | 0.875                   | 0.0024   | 0.0026   | 0.1012    |
| 175 | Raemelton Farm | 2012 | Abies koreana                               | Gymnosperm     | Asian     | 0                           | 0                       | 0                       | 0.0159   | 0        | -1        |
| 176 | Raemelton Farm | 2012 | Abies nordmanniana                          | Gymnosperm     | Non Asian | 0                           | 0                       | 0                       | 0.0027   | 0        | -1        |
| 177 | Raemelton Farm | 2012 | Acer campestre Evelyn                       | Angiosperm     | Non Asian | 0.0093                      | 1.1759                  | 0.0926                  | 0.008    | 0.0165   | 0.4124    |
| 178 | Raemelton Farm | 2012 | Acer griseum                                | Angiosperm     | Asian     | 0.0062                      | 0.3025                  | 0.0617                  | 0.0119   | 0.0082   | -0.1104   |
| 179 | Raemelton Farm | 2012 | Acer palmatum Bloodgood                     | Angiosperm     | Asian     | 0                           | 0.0139                  | 0.0139                  | 0.0053   | 0.0027   | -0.2493   |
| 180 | Raemelton Farm | 2012 | Acer palmatum Emperor I                     | Angiosperm     | Asian     | 0                           | 0                       | 0                       | 0.0027   | 0        | -1        |
| 181 | Raemelton Farm | 2012 | Acer palmatum Moonfire                      | Angiosperm     | Asian     | 0                           | 0                       | 0                       | 0.0027   | 0        | -1        |
| 182 | Raemelton Farm | 2012 | Acer palmatum Red Emperor                   | Angiosperm     | Asian     | 0                           | 0.0185                  | 0                       | 0.008    | 0.0027   | -0.4279   |
| 183 | Raemelton Farm | 2012 | Acer palmatum Sango Kaku                    | Angiosperm     | Asian     | 0                           | 0                       | 0                       | 0.0027   | 0        | -1        |
| 184 | Raemelton Farm | 2012 | Acer palmatum var. dissectum Inaba Shidare  | Angiosperm     | Asian     | 0                           | 0                       | 0                       | 0.0053   | 0        | -1        |
| 185 | Raemelton Farm | 2012 | Acer palmatum var. dissectum Viridis        | Angiosperm     | Asian     | 0                           | 0                       | 0                       | 0.0027   | 0        | -1        |
| 186 | Raemelton Farm | 2012 | Acer rubrum Bowhall                         | Angiosperm     | Non Asian | 0                           | 0.9444                  | 0                       | 0.0066   | 0.0069   | 0.0917    |
| 187 | Raemelton Farm | 2012 | Acer rubrum Brandywine                      | Angiosperm     | Non Asian | 0.0056                      | 0.5944                  | 0                       | 0.0133   | 0.0247   | 0.3678    |
| 188 | Raemelton Farm | 2012 | Acer rubrum Franksred                       | Angiosperm     | Non Asian | 0.0104                      | 0.8576                  | 0.0243                  | 0.0212   | 0.0329   | 0.2864    |
| 189 | Raemelton Farm | 2012 | Acer rubrum October Glory                   | Angiosperm     | Non Asian | 0.0278                      | 0.6944                  | 0.0278                  | 0.0053   | 0.0096   | 0.3555    |
| 190 | Raemelton Farm | 2012 | Acer rufinerve                              | Angiosperm     | Asian     | 0                           | 0.6111                  | 0                       | 0.0027   | 0.0027   | 0.0917    |
| 191 | Raemelton Farm | 2012 | Acer saccharum Commemoration                | Angiosperm     | Non Asian | 0.0556                      | 0.5                     | 0                       | 0.0013   | 0.0041   | 0.5657    |
| 192 | Raemelton Farm | 2012 | Acer saccharum Green Mountain               | Angiosperm     | Non Asian | 0.0094                      | 0.7956                  | 0.022                   | 0.0234   | 0.0302   | 0.1989    |
| 193 | Raemelton Farm | 2012 | Acer saccharum Legacy                       | Angiosperm     | Non Asian | 0.0379                      | 1.2424                  | 0                       | 0.0097   | 0.0165   | 0.3258    |
| 194 | Raemelton Farm | 2012 | Acer truncatum                              | Angiosperm     | Asian     | 0                           | 0.0556                  | 0                       | 0.0013   | 0.0014   | 0.0917    |
| 195 | Raemelton Farm | 2012 | Acer x freemanii Jeffersred                 | Angiosperm     | Non Asian | 0.0278                      | 1.3611                  | 0.0278                  | 0.0027   | 0.0069   | 0.5006    |
| 196 | Raemelton Farm | 2012 | Acer x tegmentosum White Tigress            | Angiosperm     | Asian     | 0                           | 0                       | 0                       | 0.0027   | 0        | -1        |
| 197 | Raemelton Farm | 2012 | Aesculus x carnea Briotii                   | Angiosperm     | Non Asian | 0                           | 0.0093                  | 0                       | 0.008    | 0.0014   | -0.6662   |
| 198 | Raemelton Farm | 2012 | Aesculus x carnea Fort McNair               | Angiosperm     | Non Asian | 0                           | 0.0741                  | 0.0093                  | 0.008    | 0.0055   | -0.1104   |
| 199 | Raemelton Farm | 2012 | Amelanchier x grandiflora Autumn Brilliance | Angiosperm     | Non Asian | 0                           | 0.2593                  | 0.4136                  | 0.0119   | 0.0219   | 0.3624    |
| 200 | Raemelton Farm | 2012 | Amelanchier x grandiflora Princess Diana    | Angiosperm     | Non Asian | 0.0079                      | 0.2063                  | 0.1587                  | 0.0093   | 0.0137   | 0.2639    |
| 201 | Raemelton Farm | 2012 | Betula nigra BNMTF                          | Angiosperm     | Non Asian | 0                           | 0                       | 0.0278                  | 0.0053   | 0.0027   | -0.2493   |
| 202 | Raemelton Farm | 2012 | Betula papyrifera Renci                     | Angiosperm     | Non Asian | 0                           | 1.1111                  | 0                       | 0.0027   | 0.0027   | 0.0917    |
| 203 | Raemelton Farm | 2012 | Calocedrus decurrens                        | Angiosperm     | Non Asian | 0                           | 0.0278                  | 0.1667                  | 0.0027   | 0.0041   | 0.2864    |
| 204 | Raemelton Farm | 2012 | Carpinus betulus Fastigiata                 | Angiosperm     | Non Asian | 0                           | 0.2333                  | 0.0111                  | 0.0133   | 0.0041   | -0.47     |
| 205 | Raemelton Farm | 2012 | Carpinus betulus Frans Fontaine             | Angiosperm     | Non Asian | 0                           | 0                       | 0.0648                  | 0.008    | 0.0041   | -0.2493   |
| 206 | Raemelton Farm | 2012 | Carya illinoensis Choctaw                   | Angiosperm     | Non Asian | 0                           | 0.1111                  | 0.1667                  | 0.0013   | 0.0027   | 0.4124    |
| 207 | Raemelton Farm | 2012 | Cedrus atlantica Glauca                     | Gymnosperm     | Non Asian | 0                           | 0                       | 0                       | 0.004    | 0        | -1        |
| 208 | Raemelton Farm | 2012 | Cedrus deodara Karl Fuchs                   | Gymnosperm     | Asian     | 0                           | 0                       | 0                       | 0.0027   | 0        | -1        |
| 209 | Raemelton Farm | 2012 | Cedrus deodara Shalimar                     | Gymnosperm     | Asian     | 0                           | 0                       | 0                       | 0.0027   | 0        | -1        |
| 210 | Raemelton Farm | 2012 | Cercidiphyllum japonicum                    | Angiosperm     | Asian     | 0                           | 0.5926                  | 0.0833                  | 0.008    | 0.0096   | 0.1674    |

|     | Site           | Year | Plant Taxon                            | Classification | Origin    | Egg masses per 1 min survey | Nymphs per 1 min survey | Adults per 1 min survey | p      | r      | E*      |
|-----|----------------|------|----------------------------------------|----------------|-----------|-----------------------------|-------------------------|-------------------------|--------|--------|---------|
| 211 | Raemelton Farm | 2012 | Cercis canadensis                      | Angiosperm     | Non Asian | 0.0694                      | 3.1111                  | 0.4583                  | 0.0053 | 0.011  | 0.4124  |
| 212 | Raemelton Farm | 2012 | Cercis canadensis Alba                 | Angiosperm     | Non Asian | 0                           | 2.5278                  | 0.0278                  | 0.0027 | 0.0069 | 0.5006  |
| 213 | Raemelton Farm | 2012 | Cercis canadensis Appalachian Red      | Angiosperm     | Non Asian | 0.0417                      | 0.2361                  | 0.0139                  | 0.0053 | 0.0096 | 0.3555  |
| 214 | Raemelton Farm | 2012 | Cercis canadensis Covey                | Angiosperm     | Non Asian | 0                           | 0.8056                  | 0.7222                  | 0.0053 | 0.0096 | 0.3555  |
| 215 | Raemelton Farm | 2012 | Cercis canadensis Forest Pansy         | Angiosperm     | Non Asian | 0                           | 0.1528                  | 0.0139                  | 0.0053 | 0.0082 | 0.2864  |
| 216 | Raemelton Farm | 2012 | Cercis canadensis Pink Heartbreaker    | Angiosperm     | Non Asian | 0                           | 1.9722                  | 0.0833                  | 0.0027 | 0.0055 | 0.4124  |
| 217 | Raemelton Farm | 2012 | Chamaecyparis nootkatensis Pendula     | Gymnosperm     | Non Asian | 0                           | 0                       | 0                       | 0.0106 | 0      | -1      |
| 218 | Raemelton Farm | 2012 | Chamaecyparis obtusa Aurea Nana        | Gymnosperm     | Asian     | 0                           | 0                       | 0                       | 0.0013 | 0      | -1      |
| 219 | Raemelton Farm | 2012 | Chamaecyparis obtusa Compacta          | Gymnosperm     | Asian     | 0                           | 0                       | 0                       | 0.0027 | 0      | -1      |
| 220 | Raemelton Farm | 2012 | Chamaecyparis obtusa Crippsii          | Gymnosperm     | Asian     | 0                           | 0                       | 0                       | 0.0066 | 0      | -1      |
| 221 | Raemelton Farm | 2012 | Chionanthus retusus                    | Angiosperm     | Asian     | 0                           | 0                       | 0                       | 0.0053 | 0      | -1      |
| 222 | Raemelton Farm | 2012 | Cladrastis kentukea                    | Angiosperm     | Non Asian | 0.0303                      | 1.0455                  | 0.1465                  | 0.0146 | 0.0329 | 0.4478  |
| 223 | Raemelton Farm | 2012 | Cladrastis kentukea Perkins Pink       | Angiosperm     | Non Asian | 0.0222                      | 1.6556                  | 0.0778                  | 0.0066 | 0.0137 | 0.4124  |
| 224 | Raemelton Farm | 2012 | Cornus controversa                     | Angiosperm     | Asian     | 0                           | 0.2222                  | 0.75                    | 0.0027 | 0.0082 | 0.5657  |
| 225 | Raemelton Farm | 2012 | Cornus florida Appalachian Spring      | Angiosperm     | Non Asian | 0                           | 0                       | 0.0556                  | 0.0053 | 0.0027 | -0.2493 |
| 226 | Raemelton Farm | 2012 | Cornus florida Cherokee Princess       | Angiosperm     | Non Asian | 0                           | 0.1263                  | 0.0051                  | 0.0146 | 0.0069 | -0.2934 |
| 227 | Raemelton Farm | 2012 | Cornus florida Cloud 9                 | Angiosperm     | Non Asian | 0                           | 0.2778                  | 0.0694                  | 0.0053 | 0.0027 | -0.2493 |
| 228 | Raemelton Farm | 2012 | Cornus florida COMCO #1                | Angiosperm     | Non Asian | 0                           | 0.0062                  | 0.0309                  | 0.0119 | 0.0055 | -0.3037 |
| 229 | Raemelton Farm | 2012 | Cornus florida Jean's Appalachian Snow | Angiosperm     | Non Asian | 0                           | 0                       | 0.0185                  | 0.004  | 0.0014 | -0.4279 |
| 230 | Raemelton Farm | 2012 | Cornus florida Kay's Appalachian Mist  | Angiosperm     | Non Asian | 0                           | 0                       | 0                       | 0.004  | 0      | -1      |
| 231 | Raemelton Farm | 2012 | Cornus florida x kousa Aurora          | Angiosperm     | Hybrid    | 0                           | 0                       | 0                       | 0.0027 | 0      | -1      |
| 232 | Raemelton Farm | 2012 | Cornus florida x kousa Constellation   | Angiosperm     | Hybrid    | 0                           | 0                       | 0                       | 0.0027 | 0      | -1      |
| 233 | Raemelton Farm | 2012 | Cornus florida x kousa Ruth Ellen      | Angiosperm     | Hybrid    | 0                           | 0                       | 0.0556                  | 0.0013 | 0.0014 | 0.0917  |
| 234 | Raemelton Farm | 2012 | Cornus florida x kousa Stellar Pink    | Angiosperm     | Hybrid    | 0                           | 0                       | 0                       | 0.004  | 0      | -1      |
| 235 | Raemelton Farm | 2012 | Cornus kousa Madison                   | Angiosperm     | Asian     | 0                           | 0                       | 0                       | 0.0022 | 0      | -1      |
| 236 | Raemelton Farm | 2012 | Cornus kousa National                  | Angiosperm     | Asian     | 0                           | 0                       | 0                       | 0.0027 | 0      | -1      |
| 237 | Raemelton Farm | 2012 | Cornus kousa Radiant Rose              | Angiosperm     | Asian     | 0                           | 0                       | 0                       | 0.0004 | 0      | -1      |
| 238 | Raemelton Farm | 2012 | Cornus kousa Santomi                   | Angiosperm     | Asian     | 0                           | 0.0926                  | 0.0417                  | 0.0159 | 0.0082 | -0.2493 |
| 239 | Raemelton Farm | 2012 | Cornus kousa var chinensis Milky Way   | Angiosperm     | Asian     | 0                           | 0.0139                  | 0.0069                  | 0.0106 | 0.0041 | -0.3787 |
| 240 | Raemelton Farm | 2012 | Cornus macrophylla                     | Angiosperm     | Asian     | 0                           | 0.4306                  | 0.2917                  | 0.0053 | 0.0123 | 0.4601  |
| 241 | Raemelton Farm | 2012 | Cornus officinalis                     | Angiosperm     | Asian     | 0                           | 0                       | 0.037                   | 0.008  | 0.0027 | -0.4279 |
| 242 | Raemelton Farm | 2012 | Cornus walteri                         | Angiosperm     | Non Asian | 0                           | 0                       | 0                       | 0.0027 | 0      | -1      |
| 243 | Raemelton Farm | 2012 | Crataegus laevigata Superba            | Angiosperm     | Non Asian | 0                           | 0                       | 0                       | 0.004  | 0      | -1      |
| 244 | Raemelton Farm | 2012 | Crataegus phaenopyrum                  | Angiosperm     | Non Asian | 0                           | 0                       | 0                       | 0.0013 | 0      | -1      |
| 245 | Raemelton Farm | 2012 | Crataegus viridis Winter King          | Angiosperm     | Non Asian | 0                           | 0.0873                  | 0.0079                  | 0.0186 | 0.0069 | -0.3994 |
| 246 | Raemelton Farm | 2012 | Cryptomeria japonica Black Dragon      | Gymnosperm     | Asian     | 0                           | 0                       | 0                       | 0.0027 | 0      | -1      |
| 247 | Raemelton Farm | 2012 | Cryptomeria japonica Gyokuryu          | Gymnosperm     | Asian     | 0                           | 0                       | 0                       | 0.0027 | 0      | -1      |
| 248 | Raemelton Farm | 2012 | Cryptomeria japonica Yoshino           | Gymnosperm     | Asian     | 0                           | 0                       | 0                       | 0.0027 | 0      | -1      |
| 249 | Raemelton Farm | 2012 | Ginkgo biloba Autumn Gold              | Gymnosperm     | Asian     | 0                           | 0.1181                  | 0.0139                  | 0.0106 | 0.0027 | -0.5379 |
| 250 | Raemelton Farm | 2012 | Ginkgo biloba Magyar                   | Gymnosperm     | Asian     | 0                           | 0                       | 0                       | 0.008  | 0      | -1      |
| 251 | Raemelton Farm | 2012 | Ginkgo biloba Princeton Sentry         | Gymnosperm     | Asian     | 0                           | 0                       | 0.0278                  | 0.0053 | 0.0027 | -0.2493 |
| 252 | Raemelton Farm | 2012 | Ginkgo biloba Saratoga                 | Gymnosperm     | Asian     | 0                           | 0                       | 0                       | 0.0027 | 0      | -1      |

|     | Site           | Year | Plant Taxon                           | Classification | Origin    | Egg masses per 1 min survey | Nymphs per 1 min survey | Adults per 1 min survey | <i>p</i> | <i>r</i> | <i>E*</i> |
|-----|----------------|------|---------------------------------------|----------------|-----------|-----------------------------|-------------------------|-------------------------|----------|----------|-----------|
| 253 | Raemelton Farm | 2012 | Gleditsia triacanthos Shademaster     | Angiosperm     | Non Asian | 0.0046                      | 0.412                   | 0.1435                  | 0.0159   | 0.0288   | 0.3555    |
| 254 | Raemelton Farm | 2012 | Halesia tetraptera                    | Angiosperm     | Non Asian | 0                           | 0.216                   | 0.0556                  | 0.0119   | 0.0151   | 0.1899    |
| 255 | Raemelton Farm | 2012 | Hamamelis x intermedia Arnold Promise | Angiosperm     | Hybrid    | 0                           | 0                       | 0                       | 0.0035   | 0        | -1        |
| 256 | Raemelton Farm | 2012 | Hamamelis x intermedia Diane          | Angiosperm     | Hybrid    | 0                           | 0.4                     | 0.05                    | 0.0044   | 0.0069   | 0.2864    |
| 257 | Raemelton Farm | 2012 | Heptacodium miconioides               | Angiosperm     | Asian     | 0                           | 0                       | 0                       | 0.0053   | 0        | -1        |
| 258 | Raemelton Farm | 2012 | Hibiscus syriacus Blue Bird           | Angiosperm     | Asian     | 0                           | 0.0741                  | 0.5                     | 0.004    | 0.011    | 0.5244    |
| 259 | Raemelton Farm | 2012 | Hibiscus syriacus Red Heart           | Angiosperm     | Asian     | 0                           | 0                       | 0.1667                  | 0.0013   | 0.0027   | 0.4124    |
| 260 | Raemelton Farm | 2012 | Ilex opaca Jersey Princess            | Angiosperm     | Non Asian | 0                           | 0.0278                  | 0.0278                  | 0.0027   | 0.0014   | -0.2493   |
| 261 | Raemelton Farm | 2012 | Juniperus chinensis Torulosa          | Gymnosperm     | Asian     | 0                           | 0                       | 0                       | 0.0027   | 0        | -1        |
| 262 | Raemelton Farm | 2012 | Koelreuteria paniculata               | Angiosperm     | Asian     | 0.0128                      | 0.5214                  | 0.2436                  | 0.0172   | 0.0288   | 0.3201    |
| 263 | Raemelton Farm | 2012 | Liquidambar styraciflua               | Angiosperm     | Non Asian | 0                           | 1.1389                  | 0.0278                  | 0.0027   | 0.0041   | 0.2864    |
| 264 | Raemelton Farm | 2012 | Liquidambar styraciflua Moraine       | Angiosperm     | Non Asian | 0                           | 0.0972                  | 0.0139                  | 0.0053   | 0.0055   | 0.0917    |
| 265 | Raemelton Farm | 2012 | Liquidambar styraciflua Rotundiloba   | Angiosperm     | Non Asian | 0                           | 0                       | 0                       | 0.0027   | 0        | -1        |
| 266 | Raemelton Farm | 2012 | Magnolia liliiflora x stellata Ann    | Angiosperm     | Asian     | 0                           | 0.0833                  | 0                       | 0.0027   | 0.0027   | 0.0917    |
| 267 | Raemelton Farm | 2012 | Magnolia x loebneri Leonard Messel    | Angiosperm     | Asian     | 0                           | 0.0278                  | 0                       | 0.0027   | 0.0014   | -0.2493   |
| 268 | Raemelton Farm | 2012 | Malus domestica Crimson Crisp         | Angiosperm     | unknown   | 0                           | 0                       | 0                       | 0.0027   | 0        | -1        |
| 269 | Raemelton Farm | 2012 | Malus domestica Freedom               | Angiosperm     | unknown   | 0                           | 0.0185                  | 0.0741                  | 0.004    | 0.0055   | 0.2315    |
| 270 | Raemelton Farm | 2012 | Malus domestica Liberty               | Angiosperm     | unknown   | 0                           | 0.0476                  | 0.0397                  | 0.0093   | 0.0082   | 0.0149    |
| 271 | Raemelton Farm | 2012 | Malus Donald Wyman                    | Angiosperm     | unknown   | 0                           | 0.7014                  | 0.5208                  | 0.0106   | 0.0274   | 0.5006    |
| 272 | Raemelton Farm | 2012 | Malus halliana Adirondack             | Angiosperm     | Asian     | 0                           | 0.0833                  | 0.3889                  | 0.008    | 0.0192   | 0.4743    |
| 273 | Raemelton Farm | 2012 | Malus Molten Lava                     | Angiosperm     | unknown   | 0                           | 0.3519                  | 0.8611                  | 0.008    | 0.0219   | 0.5244    |
| 274 | Raemelton Farm | 2012 | Malus Pink Princess                   | Angiosperm     | unknown   | 0                           | 0.1481                  | 0.0648                  | 0.008    | 0.011    | 0.2315    |
| 275 | Raemelton Farm | 2012 | Malus Prairifire                      | Angiosperm     | unknown   | 0.0694                      | 0.2685                  | 0.588                   | 0.0159   | 0.0425   | 0.5128    |
| 276 | Raemelton Farm | 2012 | Malus sargentii Select A              | Angiosperm     | Asian     | 0.0056                      | 0.05                    | 0.1278                  | 0.0133   | 0.0178   | 0.2195    |
| 277 | Raemelton Farm | 2012 | Malus x zumi Calocarpa                | Angiosperm     | Asian     | 0.0185                      | 0.0926                  | 0.1389                  | 0.008    | 0.0151   | 0.3757    |
| 278 | Raemelton Farm | 2012 | Metasequoia glyptostroboides          | Gymnosperm     | Asian     | 0                           | 0                       | 0                       | 0.0027   | 0        | -1        |
| 279 | Raemelton Farm | 2012 | Nyssa sylvatica                       | Angiosperm     | Non Asian | 0                           | 0.7778                  | 0                       | 0.0053   | 0.0041   | -0.0519   |
| 280 | Raemelton Farm | 2012 | Nyssa sylvatica Tupelo Tower          | Angiosperm     | Non Asian | 0                           | 0.75                    | 0                       | 0.0027   | 0.0027   | 0.0917    |
| 281 | Raemelton Farm | 2012 | Nyssa sylvatica Wildfire              | Angiosperm     | Non Asian | 0                           | 0                       | 0.0278                  | 0.0027   | 0.0014   | -0.2493   |
| 282 | Raemelton Farm | 2012 | Oxydendrum arboreum                   | Angiosperm     | Non Asian | 0                           | 0.1111                  | 0                       | 0.0027   | 0.0041   | 0.2864    |
| 283 | Raemelton Farm | 2012 | Parrotia persica                      | Angiosperm     | Non Asian | 0                           | 0                       | 0.0278                  | 0.0027   | 0.0014   | -0.2493   |
| 284 | Raemelton Farm | 2012 | Parrotia persica Ruby Vase            | Angiosperm     | Non Asian | 0                           | 0                       | 0                       | 0.0027   | 0        | -1        |
| 285 | Raemelton Farm | 2012 | Picea omorika                         | Gymnosperm     | Non Asian | 0                           | 0                       | 0                       | 0.0053   | 0        | -1        |
| 286 | Raemelton Farm | 2012 | Picea omorika Pendula                 | Gymnosperm     | Non Asian | 0                           | 0                       | 0                       | 0.0013   | 0        | -1        |
| 287 | Raemelton Farm | 2012 | Picea orientalis Atravirens           | Gymnosperm     | Non Asian | 0                           | 0                       | 0                       | 0.0027   | 0        | -1        |
| 288 | Raemelton Farm | 2012 | Picea orientalis Aurea Compacta       | Gymnosperm     | Non Asian | 0                           | 0                       | 0                       | 0.0013   | 0        | -1        |
| 289 | Raemelton Farm | 2012 | Picea orientalis Gracillis            | Gymnosperm     | Non Asian | 0                           | 0                       | 0                       | 0.0013   | 0        | -1        |
| 290 | Raemelton Farm | 2012 | Picea pungens Hoopsii                 | Gymnosperm     | Non Asian | 0                           | 0                       | 0                       | 0.0027   | 0        | -1        |
| 291 | Raemelton Farm | 2012 | Pinus bungeana                        | Gymnosperm     | Asian     | 0                           | 0                       | 0                       | 0.0027   | 0        | -1        |
| 292 | Raemelton Farm | 2012 | Pinus flexilis Vanderwolf's Pyramid   | Gymnosperm     | Non Asian | 0                           | 0                       | 0.0139                  | 0.0053   | 0.0014   | -0.5379   |
| 293 | Raemelton Farm | 2012 | Pinus koraiensis                      | Gymnosperm     | Asian     | 0                           | 0                       | 0                       | 0.0027   | 0        | -1        |
| 294 | Raemelton Farm | 2012 | Pinus koraiensis Morris Blue          | Gymnosperm     | Asian     | 0                           | 0                       | 0                       | 0.0027   | 0        | -1        |



|     | Site           | Year | Plant Taxon                      | Classification | Origin    | Egg masses per 1 min survey | Nymphs per 1 min survey | Adults per 1 min survey | <i>p</i> | <i>r</i> | <i>E*</i> |
|-----|----------------|------|----------------------------------|----------------|-----------|-----------------------------|-------------------------|-------------------------|----------|----------|-----------|
| 295 | Raemelton Farm | 2012 | Pinus parvifolia                 | Gymnosperm     | Asian     | 0                           | 0                       | 0                       | 0.0027   | 0        | -1        |
| 296 | Raemelton Farm | 2012 | Pinus strobus Pendula            | Gymnosperm     | Non Asian | 0                           | 0                       | 0                       | 0.0027   | 0        | -1        |
| 297 | Raemelton Farm | 2012 | Pinus thunbergii Thunderhead     | Gymnosperm     | Asian     | 0                           | 0                       | 0                       | 0.0013   | 0        | -1        |
| 298 | Raemelton Farm | 2012 | Platanus x acerifolia Bloodgood  | Angiosperm     | Non Asian | 0                           | 0.1597                  | 0.0347                  | 0.0106   | 0.0069   | -0.1421   |
| 299 | Raemelton Farm | 2012 | Platanus x acerifolia Yarwood    | Angiosperm     | Non Asian | 0                           | 0.6296                  | 0.0556                  | 0.008    | 0.0055   | -0.1104   |
| 300 | Raemelton Farm | 2012 | Prunus avium BaDa Bing           | Angiosperm     | Non Asian | 0                           | 0.0556                  | 0                       | 0.0027   | 0.0027   | 0.0917    |
| 301 | Raemelton Farm | 2012 | Prunus avium Stella              | Angiosperm     | Non Asian | 0                           | 1.1111                  | 0.0556                  | 0.0013   | 0.0027   | 0.4124    |
| 302 | Raemelton Farm | 2012 | Prunus cerasifera Cripoizam      | Angiosperm     | Non Asian | 0                           | 0.0238                  | 0.0794                  | 0.0093   | 0.011    | 0.1574    |
| 303 | Raemelton Farm | 2012 | Prunus cerasifera Thundercloud   | Angiosperm     | Non Asian | 0                           | 0.0139                  | 0                       | 0.0053   | 0.0014   | -0.5379   |
| 304 | Raemelton Farm | 2012 | Prunus cerasus                   | Angiosperm     | Non Asian | 0                           | 0                       | 0                       | 0.0027   | 0        | -1        |
| 305 | Raemelton Farm | 2012 | Prunus cerasus Montmorency       | Angiosperm     | Non Asian | 0                           | 1.1111                  | 0                       | 0.0013   | 0.0014   | 0.0917    |
| 306 | Raemelton Farm | 2012 | Prunus persica Red Haven         | Angiosperm     | Asian     | 0                           | 0.3333                  | 0.4889                  | 0.0066   | 0.0137   | 0.4124    |
| 307 | Raemelton Farm | 2012 | Prunus sargentii                 | Angiosperm     | Asian     | 0                           | 0.0278                  | 0.0093                  | 0.008    | 0.0041   | -0.2493   |
| 308 | Raemelton Farm | 2012 | Prunus serrula Tibetica          | Angiosperm     | Asian     | 0                           | 0                       | 0                       | 0.0013   | 0        | -1        |
| 309 | Raemelton Farm | 2012 | Prunus serrulata Kwanzan         | Angiosperm     | Asian     | 0.0111                      | 0.5667                  | 0.0333                  | 0.0066   | 0.0137   | 0.4124    |
| 310 | Raemelton Farm | 2012 | Prunus serrulata Snowgoose       | Angiosperm     | Asian     | 0                           | 0.6759                  | 0.1852                  | 0.008    | 0.0123   | 0.2864    |
| 311 | Raemelton Farm | 2012 | Prunus subhirtella Pendula       | Angiosperm     | Asian     | 0                           | 0.2222                  | 0.2315                  | 0.008    | 0.011    | 0.2315    |
| 312 | Raemelton Farm | 2012 | Prunus subhirtella Pishshzam     | Angiosperm     | Asian     | 0                           | 0.0139                  | 0.2083                  | 0.0053   | 0.0082   | 0.2864    |
| 313 | Raemelton Farm | 2012 | Prunus x incam Okame             | Angiosperm     | Asian     | 0.0093                      | 0.0185                  | 0.0093                  | 0.008    | 0.0027   | -0.4279   |
| 314 | Raemelton Farm | 2012 | Prunus x yedoensis               | Angiosperm     | Asian     | 0                           | 0.5556                  | 0                       | 0.0013   | 0.0014   | 0.0917    |
| 315 | Raemelton Farm | 2012 | Pseudocycdonia sinensis          | Angiosperm     | Asian     | 0                           | 0                       | 0                       | 0.0027   | 0        | -1        |
| 316 | Raemelton Farm | 2012 | Pyrus betulifolia                | Angiosperm     | Asian     | 0                           | 0.0278                  | 0                       | 0.0027   | 0.0014   | -0.2493   |
| 317 | Raemelton Farm | 2012 | Pyrus communis Blake's Pride     | Angiosperm     | Non Asian | 0                           | 0                       | 0                       | 0.0013   | 0        | -1        |
| 318 | Raemelton Farm | 2012 | Pyrus communis Sunrise           | Angiosperm     | Non Asian | 0                           | 0.0556                  | 0                       | 0.0013   | 0.0014   | 0.0917    |
| 319 | Raemelton Farm | 2012 | Pyrus fauriei Westwood           | Angiosperm     | Asian     | 0                           | 0.4444                  | 0                       | 0.0013   | 0.0027   | 0.4124    |
| 320 | Raemelton Farm | 2012 | Quercus acutissima               | Angiosperm     | Asian     | 0                           | 1.1111                  | 0.1111                  | 0.0027   | 0.0041   | 0.2864    |
| 321 | Raemelton Farm | 2012 | Quercus alba                     | Angiosperm     | Non Asian | 0                           | 0.4028                  | 0.0139                  | 0.0053   | 0.0041   | -0.0519   |
| 322 | Raemelton Farm | 2012 | Quercus coccinea                 | Angiosperm     | Non Asian | 0                           | 0.2121                  | 0.0152                  | 0.0146   | 0.0055   | -0.3918   |
| 323 | Raemelton Farm | 2012 | Quercus robur Fastigiata         | Angiosperm     | Non Asian | 0                           | 0                       | 0.0556                  | 0.0027   | 0.0014   | -0.2493   |
| 324 | Raemelton Farm | 2012 | Quercus robur Regal Prince       | Angiosperm     | Non Asian | 0.0247                      | 0.679                   | 0.0494                  | 0.0119   | 0.0137   | 0.1436    |
| 325 | Raemelton Farm | 2012 | Quercus rubra                    | Angiosperm     | Non Asian | 0.0035                      | 0.684                   | 0.0035                  | 0.0212   | 0.011    | -0.2493   |
| 326 | Raemelton Farm | 2012 | Rhus typhina Baitiger            | Angiosperm     | Non Asian | 0                           | 0                       | 0                       | 0.0027   | 0        | -1        |
| 327 | Raemelton Farm | 2012 | Sambucus nigra Eva               | Angiosperm     | Non Asian | 0                           | 0                       | 0                       | 0.0027   | 0        | -1        |
| 328 | Raemelton Farm | 2012 | Sophora japonica Millstone       | Angiosperm     | Asian     | 0                           | 0.6944                  | 0.2222                  | 0.0027   | 0.0082   | 0.5657    |
| 329 | Raemelton Farm | 2012 | Sophora japonica Regent          | Angiosperm     | Asian     | 0.0171                      | 0.4786                  | 0.0812                  | 0.0172   | 0.0316   | 0.3603    |
| 330 | Raemelton Farm | 2012 | Stewartia koreana                | Angiosperm     | Asian     | 0                           | 0                       | 0.0278                  | 0.0027   | 0.0014   | -0.2493   |
| 331 | Raemelton Farm | 2012 | Stewartia pseudocamellia         | Angiosperm     | Asian     | 0                           | 0.0741                  | 0.213                   | 0.008    | 0.0178   | 0.4451    |
| 332 | Raemelton Farm | 2012 | Styrax japonicus                 | Angiosperm     | Asian     | 0                           | 0.1061                  | 0.0051                  | 0.0146   | 0.0041   | -0.5063   |
| 333 | Raemelton Farm | 2012 | Styrax obassia                   | Angiosperm     | Asian     | 0                           | 0.4167                  | 0.0278                  | 0.0027   | 0.0041   | 0.2864    |
| 334 | Raemelton Farm | 2012 | Syringa pekinensis Morton        | Angiosperm     | Asian     | 0.0093                      | 0.5648                  | 0.5                     | 0.008    | 0.0247   | 0.5657    |
| 335 | Raemelton Farm | 2012 | Syringa pekinensis Zhang Zhiming | Angiosperm     | Asian     | 0                           | 0.3889                  | 6.9722                  | 0.0027   | 0.0082   | 0.5657    |
| 336 | Raemelton Farm | 2012 | Tetradium daniellii              | Angiosperm     | Asian     | 0.0139                      | 1.625                   | 0.1111                  | 0.0053   | 0.0137   | 0.5006    |

|     | Site           | Year | Plant Taxon                                 | Classification | Origin    | Egg masses per 1 min survey | Nymphs per 1 min survey | Adults per 1 min survey | <i>p</i> | <i>r</i> | <i>E*</i> |
|-----|----------------|------|---------------------------------------------|----------------|-----------|-----------------------------|-------------------------|-------------------------|----------|----------|-----------|
| 337 | Raemelton Farm | 2012 | Thuja plicata Atrovirens                    | Gymnosperm     | Non Asian | 0.0139                      | 0                       | 0.0417                  | 0.0053   | 0.0041   | -0.0519   |
| 338 | Raemelton Farm | 2012 | Thuja plicata Emerald Cone                  | Gymnosperm     | Non Asian | 0                           | 0                       | 0                       | 0.0027   | 0        | -1        |
| 339 | Raemelton Farm | 2012 | Thuja standishii x plicata Green Giant      | Gymnosperm     | Hybrid    | 0                           | 0                       | 0                       | 0.0053   | 0        | -1        |
| 340 | Raemelton Farm | 2012 | Tilia cordata Greenspire                    | Angiosperm     | Non Asian | 0.0093                      | 0.463                   | 0.0278                  | 0.008    | 0.011    | 0.2315    |
| 341 | Raemelton Farm | 2012 | Tilia tomentosa Sterling                    | Angiosperm     | Non Asian | 0.0278                      | 0.6204                  | 0.0185                  | 0.008    | 0.0082   | 0.0917    |
| 342 | Raemelton Farm | 2012 | Tsuga canadensis Pendula                    | Gymnosperm     | Non Asian | 0                           | 0                       | 0                       | 0.0013   | 0        | -1        |
| 343 | Raemelton Farm | 2012 | Ulmus americana Princeton                   | Angiosperm     | Non Asian | 0.0093                      | 0.6111                  | 0.0093                  | 0.008    | 0.0137   | 0.334     |
| 344 | Raemelton Farm | 2012 | Ulmus americana Valley Forge                | Angiosperm     | Non Asian | 0                           | 0.1667                  | 0                       | 0.0027   | 0.0027   | 0.0917    |
| 345 | Raemelton Farm | 2012 | Ulmus parvifolia Emer II                    | Angiosperm     | Asian     | 0                           | 0                       | 0.0093                  | 0.008    | 0.0014   | -0.6662   |
| 346 | Raemelton Farm | 2012 | Xanthoceras sorbifolia                      | Angiosperm     | Asian     | 0                           | 0.213                   | 0                       | 0.008    | 0.0041   | -0.2493   |
| 347 | Ruppert East   | 2012 | Acer rubrum October Glory                   | Angiosperm     | Non Asian | 0.0069                      | 1.0069                  | 0                       | 0.0625   | 0.0989   | 0.256     |
| 348 | Ruppert East   | 2012 | Acer saccharum Commemoration                | Angiosperm     | Non Asian | 0                           | 0.0278                  | 0                       | 0.0156   | 0.0055   | -0.4544   |
| 349 | Ruppert East   | 2012 | Acer saccharum Green Mountain               | Angiosperm     | Non Asian | 0.0159                      | 0.9643                  | 0.2143                  | 0.1094   | 0.1484   | 0.1827    |
| 350 | Ruppert East   | 2012 | Acer saccharum Legacy                       | Angiosperm     | Non Asian | 0                           | 0.2639                  | 0                       | 0.0313   | 0.0275   | -0.0321   |
| 351 | Ruppert East   | 2012 | Amelanchier x grandiflora Autumn Brilliance | Angiosperm     | Non Asian | 0.0324                      | 1.1111                  | 0.0046                  | 0.0938   | 0.1593   | 0.2891    |
| 352 | Ruppert East   | 2012 | Betula nigra Heritage                       | Angiosperm     | Non Asian | 0                           | 0.1875                  | 0                       | 0.0208   | 0.0165   | -0.0846   |
| 353 | Ruppert East   | 2012 | Carpinus betulus Fastigiata                 | Angiosperm     | Non Asian | 0.0208                      | 0.375                   | 0.0069                  | 0.0625   | 0.0549   | -0.0321   |
| 354 | Ruppert East   | 2012 | Cercis canadensis                           | Angiosperm     | Non Asian | 0.0556                      | 2.6528                  | 0                       | 0.0313   | 0.0604   | 0.3471    |
| 355 | Ruppert East   | 2012 | Crataegus viridis Winter King               | Angiosperm     | Non Asian | 0                           | 0.0417                  | 0                       | 0.0313   | 0.011    | -0.4544   |
| 356 | Ruppert East   | 2012 | Gleditsia triacanthos Shademaster           | Angiosperm     | Non Asian | 0                           | 0.5606                  | 0.1894                  | 0.0573   | 0.0879   | 0.2416    |
| 357 | Ruppert East   | 2012 | Malus Adams                                 | Angiosperm     | unknown   | 0                           | 0.6528                  | 0.0417                  | 0.0313   | 0.033    | 0.059     |
| 358 | Ruppert East   | 2012 | Malus Prairifire                            | Angiosperm     | unknown   | 0.0417                      | 0.4861                  | 0.0139                  | 0.0313   | 0.044    | 0.2002    |
| 359 | Ruppert East   | 2012 | Malus Spring Snow                           | Angiosperm     | unknown   | 0                           | 0.1111                  | 0                       | 0.0156   | 0.0055   | -0.4544   |
| 360 | Ruppert East   | 2012 | Malus x zumi Calocarpa                      | Angiosperm     | Asian     | 0                           | 0.9861                  | 0                       | 0.0313   | 0.0275   | -0.0321   |
| 361 | Ruppert East   | 2012 | Picea abies                                 | Gymnosperm     | Non Asian | 0                           | 0.0069                  | 0.0139                  | 0.0625   | 0.0165   | -0.5608   |
| 362 | Ruppert East   | 2012 | Prunus serrulata Kwanzan                    | Angiosperm     | Asian     | 0.0139                      | 0.3611                  | 0                       | 0.0313   | 0.022    | -0.1427   |
| 363 | Ruppert East   | 2012 | Quercus acutissima                          | Angiosperm     | Asian     | 0.0139                      | 0.4306                  | 0.0278                  | 0.0313   | 0.0549   | 0.3045    |
| 364 | Ruppert East   | 2012 | Thuja occidentalis Smaragd                  | Gymnosperm     | Non Asian | 0                           | 0.197                   | 0                       | 0.0286   | 0.022    | -0.0998   |
| 365 | Ruppert East   | 2012 | Thuja standishii x plicata Green Giant      | Gymnosperm     | Hybrid    | 0                           | 0.0067                  | 0                       | 0.0651   | 0.0055   | -0.8348   |
| 366 | Ruppert East   | 2012 | Tilia cordata Greenspire                    | Angiosperm     | Non Asian | 0.0556                      | 0                       | 0                       | 0.0156   | 0.011    | -0.1427   |
| 367 | Ruppert East   | 2012 | Ulmus parvifolia Dynasty                    | Angiosperm     | Asian     | 0                           | 0.6111                  | 0                       | 0.0156   | 0.011    | -0.1427   |
| 368 | Ruppert East   | 2012 | Ulmus parvifolia Emer II                    | Angiosperm     | Asian     | 0                           | 0.125                   | 0.0139                  | 0.0313   | 0.033    | 0.059     |
| 369 | Ruppert East   | 2012 | Zelkova serrata Village Green               | Angiosperm     | Asian     | 0                           | 0.2407                  | 0.0093                  | 0.0938   | 0.044    | -0.3332   |
| 370 | Ruppert North  | 2012 | Acer rubrum Armstrong                       | Angiosperm     | Non Asian | 0                           | 2.4352                  | 0.0093                  | 0.039    | 0.0662   | 0.2614    |
| 371 | Ruppert North  | 2012 | Acer rubrum Franksred                       | Angiosperm     | Non Asian | 0.0069                      | 1.0023                  | 0.0116                  | 0.1558   | 0.1397   | -0.0519   |
| 372 | Ruppert North  | 2012 | Acer rubrum October Glory                   | Angiosperm     | Non Asian | 0.0115                      | 1.6897                  | 0.023                   | 0.0628   | 0.1066   | 0.2614    |
| 373 | Ruppert North  | 2012 | Acer rubrum Sun Valley                      | Angiosperm     | Non Asian | 0                           | 1.6111                  | 0                       | 0.013    | 0.0147   | 0.0648    |
| 374 | Ruppert North  | 2012 | Acer saccharum Commemoration                | Angiosperm     | Non Asian | 0                           | 1.3056                  | 0.0833                  | 0.013    | 0.0221   | 0.2614    |
| 375 | Ruppert North  | 2012 | Acer saccharum Green Mountain               | Angiosperm     | Non Asian | 0.0208                      | 0.4028                  | 0.0208                  | 0.0519   | 0.0699   | 0.1497    |
| 376 | Ruppert North  | 2012 | Betula nigra BNMTF                          | Angiosperm     | Non Asian | 0                           | 0.4583                  | 0.0278                  | 0.026    | 0.0294   | 0.0648    |
| 377 | Ruppert North  | 2012 | Crataegus viridis Winter King               | Angiosperm     | Non Asian | 0.0093                      | 0.5093                  | 0.0278                  | 0.039    | 0.0441   | 0.0648    |
| 378 | Ruppert North  | 2012 | Cryptomeria japonica                        | Gymnosperm     | Asian     | 0                           | 0.5833                  | 0.0556                  | 0.013    | 0.011    | -0.0788   |

|     | Site           | Year | Plant Taxon                                 | Classification | Origin    | Egg masses per 1 min survey | Nymphs per 1 min survey | Adults per 1 min survey | <i>p</i> | <i>r</i> | <i>E*</i> |
|-----|----------------|------|---------------------------------------------|----------------|-----------|-----------------------------|-------------------------|-------------------------|----------|----------|-----------|
| 379 | Ruppert North  | 2012 | Cupressocyparis leylandii                   | Gymnosperm     | Non Asian | 0                           | 0.4375                  | 0                       | 0.0173   | 0.0074   | -0.4016   |
| 380 | Ruppert North  | 2012 | Gleditsia triacanthos Shademaster           | Angiosperm     | Non Asian | 0.0056                      | 0.55                    | 0.0444                  | 0.0649   | 0.0772   | 0.089     |
| 381 | Ruppert North  | 2012 | Gleditsia triacanthos Skyline               | Angiosperm     | Non Asian | 0                           | 0.4352                  | 0.0648                  | 0.039    | 0.0404   | 0.0214    |
| 382 | Ruppert North  | 2012 | Ilex x aquipernyi Meschick                  | Angiosperm     | Hybrid    | 0                           | 0.1444                  | 0.0056                  | 0.0649   | 0.0184   | -0.5569   |
| 383 | Ruppert North  | 2012 | Malus Prairifire                            | Angiosperm     | unknown   | 0                           | 0.7222                  | 0                       | 0.013    | 0.0147   | 0.0648    |
| 384 | Ruppert North  | 2012 | Ostrya virginiana                           | Angiosperm     | Non Asian | 0                           | 0.2778                  | 0.0278                  | 0.013    | 0.0074   | -0.2745   |
| 385 | Ruppert North  | 2012 | Picea abies                                 | Gymnosperm     | Non Asian | 0                           | 0.2222                  | 0                       | 0.013    | 0.0037   | -0.5569   |
| 386 | Ruppert North  | 2012 | Platanus x acerifolia Bloodgood             | Angiosperm     | Non Asian | 0.0083                      | 0.3778                  | 0.0583                  | 0.1299   | 0.136    | 0.0259    |
| 387 | Ruppert North  | 2012 | Prunus sargentii                            | Angiosperm     | Asian     | 0                           | 0.1944                  | 0                       | 0.013    | 0.011    | -0.0788   |
| 388 | Ruppert North  | 2012 | Prunus serrulata Kwanzan                    | Angiosperm     | Asian     | 0.0139                      | 0.4722                  | 0.0556                  | 0.026    | 0.0147   | -0.2745   |
| 389 | Ruppert North  | 2012 | Prunus x incam Okame                        | Angiosperm     | Asian     | 0                           | 0.3056                  | 0.0139                  | 0.026    | 0.011    | -0.4016   |
| 390 | Ruppert North  | 2012 | Prunus x yedoensis                          | Angiosperm     | Asian     | 0                           | 0.2222                  | 0.0069                  | 0.0519   | 0.0184   | -0.4751   |
| 391 | Ruppert North  | 2012 | Syringa reticulata Ivory Silk               | Angiosperm     | Asian     | 0                           | 1.7778                  | 0.1389                  | 0.013    | 0.0221   | 0.2614    |
| 392 | Ruppert North  | 2012 | Thuja standishii x plicata Green Giant      | Gymnosperm     | Hybrid    | 0                           | 0.0333                  | 0.1                     | 0.0216   | 0.0257   | 0.089     |
| 393 | Ruppert North  | 2012 | Tilia cordata Greenspire                    | Angiosperm     | Non Asian | 0.0278                      | 0.3148                  | 0                       | 0.039    | 0.0368   | -0.0263   |
| 394 | Ruppert North  | 2012 | Tilia tomentosa Sterling                    | Angiosperm     | Non Asian | 0.0385                      | 1.0641                  | 0.0128                  | 0.0281   | 0.0404   | 0.182     |
| 395 | Ruppert North  | 2012 | Ulmus parvifolia Dynasty                    | Angiosperm     | Asian     | 0                           | 0.4167                  | 0                       | 0.013    | 0.011    | -0.0788   |
| 396 | Raemelton Farm | 2013 | Abies koreana                               | Gymnosperm     | Asian     | 0                           | 0                       | 0.0043                  | 0.0151   | 0.001    | -0.8674   |
| 397 | Raemelton Farm | 2013 | Abies nordmanniana                          | Gymnosperm     | Non Asian | 0                           | 0                       | 0                       | 0.0023   | 0        | -1        |
| 398 | Raemelton Farm | 2013 | Acer campestre Evelyn                       | Angiosperm     | Non Asian | 0.0185                      | 0.5926                  | 0.0278                  | 0.007    | 0.0078   | 0.1035    |
| 399 | Raemelton Farm | 2013 | Acer griseum                                | Angiosperm     | Asian     | 0                           | 0.0185                  | 0.0062                  | 0.0105   | 0.0019   | -0.6595   |
| 400 | Raemelton Farm | 2013 | Acer palmatum Bloodgood                     | Angiosperm     | Asian     | 0.0093                      | 0.0093                  | 0.0463                  | 0.007    | 0.0039   | -0.238    |
| 401 | Raemelton Farm | 2013 | Acer palmatum Emperor I                     | Angiosperm     | Asian     | 0                           | 0                       | 0                       | 0.0023   | 0        | -1        |
| 402 | Raemelton Farm | 2013 | Acer palmatum Red Emperor                   | Angiosperm     | Asian     | 0                           | 0.0093                  | 0                       | 0.007    | 0.001    | -0.7333   |
| 403 | Raemelton Farm | 2013 | Acer palmatum Sango Kaku                    | Angiosperm     | Asian     | 0                           | 0                       | 0                       | 0.0023   | 0        | -1        |
| 404 | Raemelton Farm | 2013 | Acer palmatum var. dissectum Inaba Shidare  | Angiosperm     | Asian     | 0                           | 0                       | 0                       | 0.0047   | 0        | -1        |
| 405 | Raemelton Farm | 2013 | Acer palmatum var. dissectum Viridis        | Angiosperm     | Asian     | 0                           | 0                       | 0                       | 0.0023   | 0        | -1        |
| 406 | Raemelton Farm | 2013 | Acer rubrum Bowhall                         | Angiosperm     | Non Asian | 0                           | 1.0556                  | 0.0333                  | 0.0058   | 0.0078   | 0.1926    |
| 407 | Raemelton Farm | 2013 | Acer rubrum Brandywine                      | Angiosperm     | Non Asian | 0.0389                      | 1.6889                  | 0.1444                  | 0.0117   | 0.0243   | 0.3954    |
| 408 | Raemelton Farm | 2013 | Acer rubrum Franksred                       | Angiosperm     | Non Asian | 0.0299                      | 1.9872                  | 0.0769                  | 0.0151   | 0.0272   | 0.3308    |
| 409 | Raemelton Farm | 2013 | Acer rubrum October Glory                   | Angiosperm     | Non Asian | 0.0556                      | 1.25                    | 0.0278                  | 0.0047   | 0.0078   | 0.2974    |
| 410 | Raemelton Farm | 2013 | Acer rufinerve                              | Angiosperm     | Asian     | 0                           | 1.3056                  | 0                       | 0.0023   | 0.001    | -0.3684   |
| 411 | Raemelton Farm | 2013 | Acer saccharum Commemoration                | Angiosperm     | Non Asian | 0                           | 0.3333                  | 0.2778                  | 0.0012   | 0.0029   | 0.4694    |
| 412 | Raemelton Farm | 2013 | Acer saccharum Green Mountain               | Angiosperm     | Non Asian | 0.0226                      | 1.2062                  | 0.113                   | 0.0229   | 0.033    | 0.2296    |
| 413 | Raemelton Farm | 2013 | Acer saccharum Legacy                       | Angiosperm     | Non Asian | 0.0625                      | 1.5208                  | 0.1563                  | 0.0062   | 0.0107   | 0.3113    |
| 414 | Raemelton Farm | 2013 | Acer truncatum                              | Angiosperm     | Asian     | 0                           | 0                       | 0                       | 0.0012   | 0        | -1        |
| 415 | Raemelton Farm | 2013 | Acer x freemanii Jeffersred                 | Angiosperm     | Non Asian | 0                           | 6.7778                  | 0.0556                  | 0.0012   | 0.0029   | 0.4694    |
| 416 | Raemelton Farm | 2013 | Acer x tegmentosum White Tigress            | Angiosperm     | Asian     | 0                           | 0                       | 0                       | 0.0023   | 0        | -1        |
| 417 | Raemelton Farm | 2013 | Aesculus x carnea Briotii                   | Angiosperm     | Non Asian | 0                           | 0.0278                  | 0                       | 0.007    | 0.0029   | -0.3684   |
| 418 | Raemelton Farm | 2013 | Aesculus x carnea Fort McNair               | Angiosperm     | Non Asian | 0.0278                      | 0.4074                  | 0                       | 0.007    | 0.0029   | -0.3684   |
| 419 | Raemelton Farm | 2013 | Amelanchier x grandiflora Autumn Brilliance | Angiosperm     | Non Asian | 0                           | 0.3232                  | 0.6111                  | 0.0128   | 0.0262   | 0.3876    |
| 420 | Raemelton Farm | 2013 | Amelanchier x grandiflora Princess Diana    | Angiosperm     | Non Asian | 0.0079                      | 0.254                   | 0.119                   | 0.0082   | 0.0146   | 0.3285    |

|     | Site           | Year | Plant Taxon                               | Classification | Origin    | Egg masses per 1 min survey | Nymphs per 1 min survey | Adults per 1 min survey | p      | r      | E*      |
|-----|----------------|------|-------------------------------------------|----------------|-----------|-----------------------------|-------------------------|-------------------------|--------|--------|---------|
| 421 | Raemelton Farm | 2013 | Betula nigra BNMTF                        | Angiosperm     | Non Asian | 0.0278                      | 0.4861                  | 0                       | 0.0047 | 0.0039 | -0.0399 |
| 422 | Raemelton Farm | 2013 | Betula nigra Cully                        | Angiosperm     | Non Asian | 0                           | 0                       | 0.0278                  | 0.0023 | 0.001  | -0.3684 |
| 423 | Raemelton Farm | 2013 | Betula papyrifera Renci                   | Angiosperm     | Non Asian | 0                           | 0                       | 0                       | 0.0023 | 0      | -1      |
| 424 | Raemelton Farm | 2013 | Calocedrus decurrens                      | Angiosperm     | Non Asian | 0                           | 0.0278                  | 0.0278                  | 0.0047 | 0.0029 | -0.1817 |
| 425 | Raemelton Farm | 2013 | Carpinus betulus Fastigiata               | Angiosperm     | Non Asian | 0.0062                      | 0.3765                  | 0.0247                  | 0.0105 | 0.0097 | 0.0127  |
| 426 | Raemelton Farm | 2013 | Carpinus betulus Frans Fontaine           | Angiosperm     | Non Asian | 0                           | 0.3194                  | 0.0139                  | 0.0047 | 0.0019 | -0.3684 |
| 427 | Raemelton Farm | 2013 | Carya illinoensis Choctaw                 | Angiosperm     | Non Asian | 0                           | 0.7778                  | 0.3889                  | 0.0012 | 0.0029 | 0.4694  |
| 428 | Raemelton Farm | 2013 | Cedrus atlantica Glauca                   | Gymnosperm     | Non Asian | 0                           | 0                       | 0                       | 0.007  | 0      | -1      |
| 429 | Raemelton Farm | 2013 | Cedrus atlantica Kroh's Twisted           | Gymnosperm     | Non Asian | 0                           | 0                       | 0                       | 0.0012 | 0      | -1      |
| 430 | Raemelton Farm | 2013 | Cedrus deodara Karl Fuchs                 | Gymnosperm     | Asian     | 0                           | 0                       | 0                       | 0.0023 | 0      | -1      |
| 431 | Raemelton Farm | 2013 | Cedrus deodara Shalimar                   | Gymnosperm     | Asian     | 0                           | 0.1111                  | 0                       | 0.0023 | 0.001  | -0.3684 |
| 432 | Raemelton Farm | 2013 | Cercidiphyllum japonicum                  | Angiosperm     | Asian     | 0                           | 0.825                   | 0.325                   | 0.0078 | 0.0146 | 0.3501  |
| 433 | Raemelton Farm | 2013 | Cercis canadensis                         | Angiosperm     | Non Asian | 0.0139                      | 1.3472                  | 0.0417                  | 0.0047 | 0.0068 | 0.2354  |
| 434 | Raemelton Farm | 2013 | Cercis canadensis Alba                    | Angiosperm     | Non Asian | 0                           | 0.3889                  | 0.3889                  | 0.0023 | 0.0049 | 0.3954  |
| 435 | Raemelton Farm | 2013 | Cercis canadensis Appalachian Red         | Angiosperm     | Non Asian | 0                           | 0.6806                  | 0.0417                  | 0.0047 | 0.0058 | 0.1614  |
| 436 | Raemelton Farm | 2013 | Cercis canadensis Covey                   | Angiosperm     | Non Asian | 0.0556                      | 0                       | 0                       | 0.0035 | 0.001  | -0.5294 |
| 437 | Raemelton Farm | 2013 | Cercis canadensis Forest Pansy            | Angiosperm     | Non Asian | 0                           | 1                       | 0.0278                  | 0.0023 | 0.0039 | 0.2974  |
| 438 | Raemelton Farm | 2013 | Cercis canadensis Pink Heartbreaker       | Angiosperm     | Non Asian | 0                           | 0                       | 0                       | 0.0023 | 0      | -1      |
| 439 | Raemelton Farm | 2013 | Chamaecyparis nootkatensis Pendula        | Gymnosperm     | Non Asian | 0                           | 0                       | 0.0139                  | 0.014  | 0.001  | -0.8571 |
| 440 | Raemelton Farm | 2013 | Chamaecyparis nootkatensis Pendula Glauca | Gymnosperm     | Non Asian | 0                           | 0.0278                  | 0                       | 0.0023 | 0.001  | -0.3684 |
| 441 | Raemelton Farm | 2013 | Chamaecyparis obtusa Aurea Nana           | Gymnosperm     | Asian     | 0                           | 0                       | 0                       | 0.0016 | 0      | -1      |
| 442 | Raemelton Farm | 2013 | Chamaecyparis obtusa Compacta             | Gymnosperm     | Asian     | 0                           | 0                       | 0                       | 0.0019 | 0      | -1      |
| 443 | Raemelton Farm | 2013 | Chamaecyparis obtusa Crippsii             | Gymnosperm     | Asian     | 0                           | 0                       | 0.0079                  | 0.0082 | 0.001  | -0.767  |
| 444 | Raemelton Farm | 2013 | Chamaecyparis obtusa Gimborn's Beauty     | Gymnosperm     | Asian     | 0                           | 0                       | 0                       | 0.0012 | 0      | -1      |
| 445 | Raemelton Farm | 2013 | Chamaecyparis obtusa Kosteri              | Gymnosperm     | Asian     | 0                           | 0                       | 0                       | 0.0012 | 0      | -1      |
| 446 | Raemelton Farm | 2013 | Chionanthus retusus                       | Angiosperm     | Asian     | 0                           | 0.0694                  | 0.0833                  | 0.0047 | 0.0039 | -0.0399 |
| 447 | Raemelton Farm | 2013 | Cladrastis kentukea                       | Angiosperm     | Non Asian | 0.0079                      | 0.5873                  | 0.2302                  | 0.0082 | 0.0126 | 0.2632  |
| 448 | Raemelton Farm | 2013 | Cladrastis kentukea Perkins Pink          | Angiosperm     | Non Asian | 0                           | 0.9028                  | 0.125                   | 0.0047 | 0.0078 | 0.2974  |
| 449 | Raemelton Farm | 2013 | Cornus controversa                        | Angiosperm     | Asian     | 0                           | 0.1389                  | 0.1528                  | 0.0047 | 0.0078 | 0.2974  |
| 450 | Raemelton Farm | 2013 | Cornus florida Appalachian Spring         | Angiosperm     | Non Asian | 0                           | 0.5                     | 0.0139                  | 0.0047 | 0.0019 | -0.3684 |
| 451 | Raemelton Farm | 2013 | Cornus florida Cherokee Princess          | Angiosperm     | Non Asian | 0                           | 0.0741                  | 0                       | 0.0105 | 0.0029 | -0.5294 |
| 452 | Raemelton Farm | 2013 | Cornus florida Cloud 9                    | Angiosperm     | Non Asian | 0                           | 0.0556                  | 0.0139                  | 0.0047 | 0.0039 | -0.0399 |
| 453 | Raemelton Farm | 2013 | Cornus florida COMCO #1                   | Angiosperm     | Non Asian | 0                           | 0.0864                  | 0.0309                  | 0.0105 | 0.0049 | -0.322  |
| 454 | Raemelton Farm | 2013 | Cornus florida Jean's Appalachian Snow    | Angiosperm     | Non Asian | 0                           | 0                       | 0.1667                  | 0.0035 | 0.0029 | -0.0399 |
| 455 | Raemelton Farm | 2013 | Cornus florida Kay's Appalachian Mist     | Angiosperm     | Non Asian | 0                           | 0.037                   | 0.0556                  | 0.0035 | 0.0029 | -0.0399 |
| 456 | Raemelton Farm | 2013 | Cornus florida x kousa Aurora             | Angiosperm     | Hybrid    | 0                           | 0.0278                  | 0                       | 0.0023 | 0.001  | -0.3684 |
| 457 | Raemelton Farm | 2013 | Cornus florida x kousa Constellation      | Angiosperm     | Hybrid    | 0                           | 0.1111                  | 0                       | 0.0012 | 0.0019 | 0.2974  |
| 458 | Raemelton Farm | 2013 | Cornus florida x kousa Ruth Ellen         | Angiosperm     | Hybrid    | 0                           | 1.2222                  | 0.1667                  | 0.0012 | 0.0019 | 0.2974  |
| 459 | Raemelton Farm | 2013 | Cornus florida x kousa Stellar Pink       | Angiosperm     | Hybrid    | 0                           | 0.0278                  | 0                       | 0.0023 | 0.001  | -0.3684 |
| 460 | Raemelton Farm | 2013 | Cornus kousa Madison                      | Angiosperm     | Asian     | 0                           | 0.0667                  | 0.0667                  | 0.0019 | 0.0019 | 0.0512  |
| 461 | Raemelton Farm | 2013 | Cornus kousa National                     | Angiosperm     | Asian     | 0                           | 0.4444                  | 0                       | 0.0023 | 0.0049 | 0.3954  |
| 462 | Raemelton Farm | 2013 | Cornus kousa Radiant Rose                 | Angiosperm     | Asian     | 0                           | 0                       | 0                       | 0.0004 | 0      | -1      |

|     | Site           | Year | Plant Taxon                            | Classification | Origin    | Egg masses per 1 min survey | Nymphs per 1 min survey | Adults per 1 min survey | <i>p</i> | <i>r</i> | <i>E*</i> |
|-----|----------------|------|----------------------------------------|----------------|-----------|-----------------------------|-------------------------|-------------------------|----------|----------|-----------|
| 463 | Raemelton Farm | 2013 | Cornus kousa Santomi                   | Angiosperm     | Asian     | 0                           | 0.2824                  | 0.037                   | 0.014    | 0.0117   | -0.0399   |
| 464 | Raemelton Farm | 2013 | Cornus kousa var chinensis Milky Way   | Angiosperm     | Asian     | 0                           | 0.0278                  | 0.1481                  | 0.007    | 0.0087   | 0.1614    |
| 465 | Raemelton Farm | 2013 | Cornus macrophylla                     | Angiosperm     | Asian     | 0.0139                      | 0.5139                  | 0.0556                  | 0.0047   | 0.0058   | 0.1614    |
| 466 | Raemelton Farm | 2013 | Cornus officinalis                     | Angiosperm     | Asian     | 0                           | 0                       | 0.0833                  | 0.007    | 0.0029   | -0.3684   |
| 467 | Raemelton Farm | 2013 | Cornus walteri                         | Angiosperm     | Non Asian | 0                           | 0.8333                  | 0.0833                  | 0.0023   | 0.0039   | 0.2974    |
| 468 | Raemelton Farm | 2013 | Crataegus laevigata Superba            | Angiosperm     | Non Asian | 0                           | 0                       | 0                       | 0.0035   | 0        | -1        |
| 469 | Raemelton Farm | 2013 | Crataegus phaenopyrum                  | Angiosperm     | Non Asian | 0                           | 0.0185                  | 0.037                   | 0.0035   | 0.0019   | -0.238    |
| 470 | Raemelton Farm | 2013 | Crataegus viridis Winter King          | Angiosperm     | Non Asian | 0.0079                      | 0.1746                  | 0.1071                  | 0.0163   | 0.0146   | -0.0054   |
| 471 | Raemelton Farm | 2013 | Cryptomeria japonica Black Dragon      | Gymnosperm     | Asian     | 0                           | 0                       | 0                       | 0.0058   | 0        | -1        |
| 472 | Raemelton Farm | 2013 | Cryptomeria japonica Gyokuryu          | Gymnosperm     | Asian     | 0                           | 0                       | 0                       | 0.007    | 0        | -1        |
| 473 | Raemelton Farm | 2013 | Cryptomeria japonica Yoshino           | Gymnosperm     | Asian     | 0                           | 0.4                     | 0.1111                  | 0.0058   | 0.0029   | -0.2871   |
| 474 | Raemelton Farm | 2013 | Ficus carica Chicago Hardy             | Angiosperm     | Non Asian | 0.1111                      | 0.1667                  | 0.1111                  | 0.0012   | 0.0019   | 0.2974    |
| 475 | Raemelton Farm | 2013 | Ginkgo biloba Autumn Gold              | Gymnosperm     | Asian     | 0.0159                      | 0.0079                  | 0.0317                  | 0.0082   | 0.0049   | -0.2052   |
| 476 | Raemelton Farm | 2013 | Ginkgo biloba Magyar                   | Gymnosperm     | Asian     | 0                           | 0                       | 0.0185                  | 0.007    | 0.001    | -0.7333   |
| 477 | Raemelton Farm | 2013 | Ginkgo biloba Princeton Sentry         | Gymnosperm     | Asian     | 0.0159                      | 0.3571                  | 0.0159                  | 0.0082   | 0.0058   | -0.1165   |
| 478 | Raemelton Farm | 2013 | Ginkgo biloba Saratoga                 | Gymnosperm     | Asian     | 0                           | 0                       | 0                       | 0.0023   | 0        | -1        |
| 479 | Raemelton Farm | 2013 | Gleditsia triacanthos Shademaster      | Angiosperm     | Non Asian | 0.0119                      | 0.5079                  | 0.496                   | 0.0163   | 0.033    | 0.3831    |
| 480 | Raemelton Farm | 2013 | Halesia tetraptera                     | Angiosperm     | Non Asian | 0.0069                      | 0.6458                  | 0.0417                  | 0.0093   | 0.0126   | 0.2001    |
| 481 | Raemelton Farm | 2013 | Hamamelis x intermedia Arnold Promise  | Angiosperm     | Hybrid    | 0                           | 0.0083                  | 0.0167                  | 0.0078   | 0.001    | -0.7567   |
| 482 | Raemelton Farm | 2013 | Hamamelis x intermedia Diane           | Angiosperm     | Hybrid    | 0                           | 0                       | 0.0417                  | 0.0062   | 0.0029   | -0.3164   |
| 483 | Raemelton Farm | 2013 | Hamamelis x intermedia Jelena          | Angiosperm     | Hybrid    | 0                           | 0                       | 0                       | 0.0012   | 0        | -1        |
| 484 | Raemelton Farm | 2013 | Heptacodium miconioides                | Angiosperm     | Asian     | 0                           | 0                       | 0.037                   | 0.0035   | 0.001    | -0.5294   |
| 485 | Raemelton Farm | 2013 | Hibiscus syriacus Blue Bird            | Angiosperm     | Asian     | 0                           | 0.4259                  | 0.6111                  | 0.0035   | 0.0078   | 0.4223    |
| 486 | Raemelton Farm | 2013 | Hibiscus syriacus Diana                | Angiosperm     | Asian     | 0                           | 0                       | 0.1111                  | 0.0023   | 0.0019   | -0.0399   |
| 487 | Raemelton Farm | 2013 | Hibiscus syriacus Red Heart            | Angiosperm     | Asian     | 0                           | 0.463                   | 0.3519                  | 0.0035   | 0.0058   | 0.2974    |
| 488 | Raemelton Farm | 2013 | Hibiscus syriacus Satin Blue           | Angiosperm     | Asian     | 0                           | 0.3472                  | 1.4861                  | 0.0047   | 0.0087   | 0.3501    |
| 489 | Raemelton Farm | 2013 | Ilex opaca Jersey Princess             | Angiosperm     | Non Asian | 0                           | 0.1667                  | 0                       | 0.0023   | 0.001    | -0.3684   |
| 490 | Raemelton Farm | 2013 | Juniperus chinensis Torulosa           | Gymnosperm     | Asian     | 0                           | 0                       | 0                       | 0.0023   | 0        | -1        |
| 491 | Raemelton Farm | 2013 | Koelreuteria paniculata                | Angiosperm     | Asian     | 0.0299                      | 0.9274                  | 1.0769                  | 0.0151   | 0.0262   | 0.3145    |
| 492 | Raemelton Farm | 2013 | Larix kaempferi                        | Gymnosperm     | Asian     | 0                           | 0                       | 0                       | 0.0023   | 0        | -1        |
| 493 | Raemelton Farm | 2013 | Liquidambar styraciflua                | Angiosperm     | Non Asian | 0.0556                      | 0.1667                  | 0.3889                  | 0.0023   | 0.0039   | 0.2974    |
| 494 | Raemelton Farm | 2013 | Liquidambar styraciflua Hapdell        | Angiosperm     | Non Asian | 0                           | 0                       | 0.1667                  | 0.0008   | 0.0019   | 0.4694    |
| 495 | Raemelton Farm | 2013 | Liquidambar styraciflua Moraine        | Angiosperm     | Non Asian | 0                           | 0.1296                  | 0.1481                  | 0.0035   | 0.0068   | 0.3659    |
| 496 | Raemelton Farm | 2013 | Liquidambar styraciflua Rotundiloba    | Angiosperm     | Non Asian | 0.0556                      | 0                       | 0.0278                  | 0.0023   | 0.0029   | 0.1614    |
| 497 | Raemelton Farm | 2013 | Magnolia liliiflora x stellata Ann     | Angiosperm     | Asian     | 0                           | 0                       | 0.0278                  | 0.0023   | 0.001    | -0.3684   |
| 498 | Raemelton Farm | 2013 | Magnolia liliiflora x stellata Merrill | Angiosperm     | Asian     | 0                           | 0.1667                  | 1.0278                  | 0.0023   | 0.0049   | 0.3954    |
| 499 | Raemelton Farm | 2013 | Magnolia x loebneri Leonard Messel     | Angiosperm     | Asian     | 0                           | 1.0833                  | 0.0278                  | 0.0023   | 0.0029   | 0.1614    |
| 500 | Raemelton Farm | 2013 | Malus domestica Crimson Crisp          | Angiosperm     | unknown   | 0                           | 0.1389                  | 2.7222                  | 0.0023   | 0.0058   | 0.4694    |
| 501 | Raemelton Farm | 2013 | Malus domestica Freedom                | Angiosperm     | unknown   | 0                           | 0.2778                  | 0.5667                  | 0.0058   | 0.0117   | 0.3781    |
| 502 | Raemelton Farm | 2013 | Malus domestica Liberty                | Angiosperm     | unknown   | 0.0079                      | 0.0714                  | 0.5556                  | 0.0082   | 0.0146   | 0.3285    |
| 503 | Raemelton Farm | 2013 | Malus Donald Wyman                     | Angiosperm     | unknown   | 0                           | 0.6528                  | 0.7222                  | 0.0093   | 0.0194   | 0.3954    |
| 504 | Raemelton Farm | 2013 | Malus halliana Adirondack              | Angiosperm     | Asian     | 0.0093                      | 0.0833                  | 0.1389                  | 0.007    | 0.0126   | 0.3334    |

|     | Site           | Year | Plant Taxon                          | Classification | Origin    | Egg masses per 1 min survey | Nymphs per 1 min survey | Adults per 1 min survey | p      | r      | E*      |
|-----|----------------|------|--------------------------------------|----------------|-----------|-----------------------------|-------------------------|-------------------------|--------|--------|---------|
| 505 | Raemelton Farm | 2013 | Malus Molten Lava                    | Angiosperm     | unknown   | 0                           | 0.537                   | 0.0278                  | 0.007  | 0.0049 | -0.1304 |
| 506 | Raemelton Farm | 2013 | Malus Pink Princess                  | Angiosperm     | unknown   | 0                           | 0                       | 0.0185                  | 0.007  | 0.001  | -0.7333 |
| 507 | Raemelton Farm | 2013 | Malus Prairifire                     | Angiosperm     | unknown   | 0                           | 0.1528                  | 0.2454                  | 0.014  | 0.0233 | 0.2974  |
| 508 | Raemelton Farm | 2013 | Malus sargentii Select A             | Angiosperm     | Asian     | 0.0222                      | 0.15                    | 0.5278                  | 0.0117 | 0.0233 | 0.3781  |
| 509 | Raemelton Farm | 2013 | Malus x zumi Calocarpa               | Angiosperm     | Asian     | 0.0079                      | 0.3651                  | 0.1667                  | 0.0082 | 0.0155 | 0.357   |
| 510 | Raemelton Farm | 2013 | Metasequoia glyptostroboides         | Gymnosperm     | Asian     | 0                           | 0.4028                  | 0.0139                  | 0.0047 | 0.0029 | -0.1817 |
| 511 | Raemelton Farm | 2013 | Nyssa sylvatica                      | Angiosperm     | Non Asian | 0                           | 0.0556                  | 0.2222                  | 0.0047 | 0.0058 | 0.1614  |
| 512 | Raemelton Farm | 2013 | Nyssa sylvatica Wildfire             | Angiosperm     | Non Asian | 0                           | 0.0833                  | 0.0833                  | 0.0023 | 0.0029 | 0.1614  |
| 513 | Raemelton Farm | 2013 | Oxydendrum arboreum                  | Angiosperm     | Non Asian | 0                           | 0.2639                  | 0                       | 0.0047 | 0.001  | -0.625  |
| 514 | Raemelton Farm | 2013 | Parrotia persica                     | Angiosperm     | Non Asian | 0                           | 0.0833                  | 0                       | 0.0023 | 0.0019 | -0.0399 |
| 515 | Raemelton Farm | 2013 | Parrotia persica Ruby Vase           | Angiosperm     | Non Asian | 0                           | 0.0833                  | 0                       | 0.0023 | 0.001  | -0.3684 |
| 516 | Raemelton Farm | 2013 | Picea meyeri                         | Gymnosperm     | Asian     | 0                           | 0                       | 0                       | 0.0023 | 0      | -1      |
| 517 | Raemelton Farm | 2013 | Picea omorika                        | Gymnosperm     | Non Asian | 0                           | 0                       | 0.0069                  | 0.0093 | 0.001  | -0.7931 |
| 518 | Raemelton Farm | 2013 | Picea omorika Pendula                | Gymnosperm     | Non Asian | 0                           | 0                       | 0                       | 0.0058 | 0      | -1      |
| 519 | Raemelton Farm | 2013 | Picea orientalis Atrovirens          | Gymnosperm     | Non Asian | 0                           | 0                       | 0.0278                  | 0.0023 | 0.001  | -0.3684 |
| 520 | Raemelton Farm | 2013 | Picea orientalis Aurea Compacta      | Gymnosperm     | Non Asian | 0                           | 0                       | 0                       | 0.0035 | 0      | -1      |
| 521 | Raemelton Farm | 2013 | Picea orientalis Gracillis           | Gymnosperm     | Non Asian | 0                           | 0                       | 0                       | 0.0012 | 0      | -1      |
| 522 | Raemelton Farm | 2013 | Picea pungens Blue Diamond           | Gymnosperm     | Non Asian | 0                           | 0.0139                  | 0                       | 0.0047 | 0.001  | -0.625  |
| 523 | Raemelton Farm | 2013 | Picea pungens Fastigiata             | Gymnosperm     | Non Asian | 0                           | 0                       | 0                       | 0.0023 | 0      | -1      |
| 524 | Raemelton Farm | 2013 | Picea pungens Fat Albert             | Gymnosperm     | Non Asian | 0                           | 0                       | 0                       | 0.0093 | 0      | -1      |
| 525 | Raemelton Farm | 2013 | Picea pungens Glauca Iseli Fastigata | Gymnosperm     | Non Asian | 0                           | 0                       | 0                       | 0.0023 | 0      | -1      |
| 526 | Raemelton Farm | 2013 | Picea pungens Glauca Majestic Blue   | Gymnosperm     | Non Asian | 0                           | 0                       | 0                       | 0.0023 | 0      | -1      |
| 527 | Raemelton Farm | 2013 | Picea pungens Glauca Van Sikes       | Gymnosperm     | Non Asian | 0                           | 0                       | 0                       | 0.007  | 0      | -1      |
| 528 | Raemelton Farm | 2013 | Picea pungens Hoopsii                | Gymnosperm     | Non Asian | 0                           | 0                       | 0                       | 0.0047 | 0      | -1      |
| 529 | Raemelton Farm | 2013 | Pinus bungeana                       | Gymnosperm     | Asian     | 0                           | 0                       | 0                       | 0.0023 | 0      | -1      |
| 530 | Raemelton Farm | 2013 | Pinus cembra Chalet                  | Gymnosperm     | Non Asian | 0                           | 0                       | 0                       | 0.0023 | 0      | -1      |
| 531 | Raemelton Farm | 2013 | Pinus cembra Silver Sheen            | Gymnosperm     | Non Asian | 0                           | 2.0556                  | 0.1111                  | 0.0012 | 0.0019 | 0.2974  |
| 532 | Raemelton Farm | 2013 | Pinus densiflora Umbraculifera       | Gymnosperm     | Asian     | 0                           | 0                       | 0                       | 0.0012 | 0      | -1      |
| 533 | Raemelton Farm | 2013 | Pinus flexilis Vanderwolf's Pyramid  | Gymnosperm     | Non Asian | 0                           | 0                       | 0                       | 0.007  | 0      | -1      |
| 534 | Raemelton Farm | 2013 | Pinus koraiensis                     | Gymnosperm     | Asian     | 0                           | 0                       | 0                       | 0.0047 | 0      | -1      |
| 535 | Raemelton Farm | 2013 | Pinus koraiensis Morris Blue         | Gymnosperm     | Asian     | 0                           | 0.0139                  | 0                       | 0.0047 | 0.001  | -0.625  |
| 536 | Raemelton Farm | 2013 | Pinus nigra Arnold Sentinel          | Gymnosperm     | Non Asian | 0                           | 0                       | 0                       | 0.0012 | 0      | -1      |
| 537 | Raemelton Farm | 2013 | Pinus strobus Pendula                | Gymnosperm     | Non Asian | 0                           | 0                       | 0                       | 0.0023 | 0      | -1      |
| 538 | Raemelton Farm | 2013 | Pinus thunbergii Thunderhead         | Gymnosperm     | Asian     | 0                           | 0                       | 0                       | 0.0012 | 0      | -1      |
| 539 | Raemelton Farm | 2013 | Platanus x acerifolia Bloodgood      | Angiosperm     | Non Asian | 0.0231                      | 1.4583                  | 0.4213                  | 0.014  | 0.0252 | 0.3334  |
| 540 | Raemelton Farm | 2013 | Platanus x acerifolia Yarwood        | Angiosperm     | Non Asian | 0.0139                      | 1.25                    | 0.1111                  | 0.0047 | 0.0078 | 0.2974  |
| 541 | Raemelton Farm | 2013 | Prunus avium BaDa Bing               | Angiosperm     | Non Asian | 0                           | 0.2222                  | 0.1389                  | 0.0023 | 0.0039 | 0.2974  |
| 542 | Raemelton Farm | 2013 | Prunus avium Stella                  | Angiosperm     | Non Asian | 0                           | 0                       | 0.0556                  | 0.0012 | 0.001  | -0.0399 |
| 543 | Raemelton Farm | 2013 | Prunus cerasifera Crimson Pointe     | Angiosperm     | Non Asian | 0                           | 0.0556                  | 0.8889                  | 0.0023 | 0.0039 | 0.2974  |
| 544 | Raemelton Farm | 2013 | Prunus cerasifera Cripoizam          | Angiosperm     | Non Asian | 0.0079                      | 0.2302                  | 0.0714                  | 0.0082 | 0.0068 | -0.0399 |
| 545 | Raemelton Farm | 2013 | Prunus cerasifera Thundercloud       | Angiosperm     | Non Asian | 0                           | 0.0093                  | 0.0093                  | 0.007  | 0.0019 | -0.5294 |
| 546 | Raemelton Farm | 2013 | Prunus cerasus                       | Angiosperm     | Non Asian | 0                           | 0.0556                  | 0.1944                  | 0.0023 | 0.0039 | 0.2974  |

|     | Site           | Year | Plant Taxon                            | Classification | Origin    | Egg masses per 1 min survey | Nymphs per 1 min survey | Adults per 1 min survey | <i>p</i> | <i>r</i> | <i>E*</i> |
|-----|----------------|------|----------------------------------------|----------------|-----------|-----------------------------|-------------------------|-------------------------|----------|----------|-----------|
| 547 | Raemelton Farm | 2013 | Prunus cerasus Montmorency             | Angiosperm     | Non Asian | 0                           | 0.0556                  | 0.2778                  | 0.0012   | 0.0029   | 0.4694    |
| 548 | Raemelton Farm | 2013 | Prunus persica Red Haven               | Angiosperm     | Asian     | 0                           | 0.1778                  | 1.5556                  | 0.0058   | 0.0117   | 0.3781    |
| 549 | Raemelton Farm | 2013 | Prunus sargentii                       | Angiosperm     | Asian     | 0.0278                      | 0.037                   | 0.0741                  | 0.007    | 0.0078   | 0.1035    |
| 550 | Raemelton Farm | 2013 | Prunus serrula Tibetica                | Angiosperm     | Asian     | 0                           | 0                       | 0                       | 0.0012   | 0        | -1        |
| 551 | Raemelton Farm | 2013 | Prunus serrulata Kwanzan               | Angiosperm     | Asian     | 0                           | 0.3611                  | 0.1667                  | 0.0047   | 0.0087   | 0.3501    |
| 552 | Raemelton Farm | 2013 | Prunus serrulata Snowgoose             | Angiosperm     | Asian     | 0.0069                      | 0.1181                  | 0.1667                  | 0.0093   | 0.0097   | 0.0715    |
| 553 | Raemelton Farm | 2013 | Prunus subhirtella Pendula             | Angiosperm     | Asian     | 0.0139                      | 0.0833                  | 0.5694                  | 0.0047   | 0.0087   | 0.3501    |
| 554 | Raemelton Farm | 2013 | Prunus subhirtella Pisnshzam           | Angiosperm     | Asian     | 0.0278                      | 0.0694                  | 0                       | 0.0047   | 0.0049   | 0.0715    |
| 555 | Raemelton Farm | 2013 | Prunus x incam Okame                   | Angiosperm     | Asian     | 0.0079                      | 0.1984                  | 0.0159                  | 0.0082   | 0.0058   | -0.1165   |
| 556 | Raemelton Farm | 2013 | Prunus x yedoensis                     | Angiosperm     | Asian     | 0.0556                      | 0.1667                  | 0.3333                  | 0.0012   | 0.0029   | 0.4694    |
| 557 | Raemelton Farm | 2013 | Pseudocodonia sinensis                 | Angiosperm     | Asian     | 0                           | 0.0833                  | 0.1389                  | 0.0023   | 0.0029   | 0.1614    |
| 558 | Raemelton Farm | 2013 | Pyrus betulifolia                      | Angiosperm     | Asian     | 0.0278                      | 0.1389                  | 0.2222                  | 0.0023   | 0.0058   | 0.4694    |
| 559 | Raemelton Farm | 2013 | Pyrus communis Blake's Pride           | Angiosperm     | Non Asian | 0                           | 0                       | 0.5556                  | 0.0012   | 0.0029   | 0.4694    |
| 560 | Raemelton Farm | 2013 | Pyrus communis Sunrise                 | Angiosperm     | Non Asian | 0                           | 0                       | 0.1667                  | 0.0012   | 0.0019   | 0.2974    |
| 561 | Raemelton Farm | 2013 | Pyrus fauriei Westwood                 | Angiosperm     | Asian     | 0                           | 0                       | 0.1111                  | 0.0012   | 0.001    | -0.0399   |
| 562 | Raemelton Farm | 2013 | Quercus acutissima                     | Angiosperm     | Asian     | 0.0278                      | 0.5833                  | 0                       | 0.0023   | 0.0019   | -0.0399   |
| 563 | Raemelton Farm | 2013 | Quercus alba                           | Angiosperm     | Non Asian | 0                           | 0.3333                  | 0.1111                  | 0.0023   | 0.0019   | -0.0399   |
| 564 | Raemelton Farm | 2013 | Quercus coccinea                       | Angiosperm     | Non Asian | 0.0069                      | 0.0556                  | 0.1389                  | 0.0093   | 0.0107   | 0.1187    |
| 565 | Raemelton Farm | 2013 | Quercus robur Fastigiata               | Angiosperm     | Non Asian | 0.1111                      | 0.75                    | 0                       | 0.0023   | 0.0049   | 0.3954    |
| 566 | Raemelton Farm | 2013 | Quercus robur Regal Prince             | Angiosperm     | Non Asian | 0                           | 0.1852                  | 0.0247                  | 0.0105   | 0.0049   | -0.322    |
| 567 | Raemelton Farm | 2013 | Quercus rubra                          | Angiosperm     | Non Asian | 0.0139                      | 0.4028                  | 0.066                   | 0.0186   | 0.0233   | 0.1614    |
| 568 | Raemelton Farm | 2013 | Rhus typhina Bailtiger                 | Angiosperm     | Non Asian | 0                           | 0                       | 0                       | 0.0023   | 0        | -1        |
| 569 | Raemelton Farm | 2013 | Sambucus nigra Eva                     | Angiosperm     | Non Asian | 0                           | 0                       | 0                       | 0.0023   | 0        | -1        |
| 570 | Raemelton Farm | 2013 | Sophora japonica Millstone             | Angiosperm     | Asian     | 0.0556                      | 6.1389                  | 1.7778                  | 0.0023   | 0.0058   | 0.4694    |
| 571 | Raemelton Farm | 2013 | Sophora japonica Regent                | Angiosperm     | Asian     | 0.0171                      | 1.5299                  | 0.5897                  | 0.0151   | 0.034    | 0.4262    |
| 572 | Raemelton Farm | 2013 | Stewartia koreana                      | Angiosperm     | Asian     | 0                           | 0                       | 0.0833                  | 0.0023   | 0.0019   | -0.0399   |
| 573 | Raemelton Farm | 2013 | Stewartia pseudocamellia               | Angiosperm     | Asian     | 0                           | 0.0185                  | 0.1296                  | 0.007    | 0.0097   | 0.2122    |
| 574 | Raemelton Farm | 2013 | Styrax japonicus                       | Angiosperm     | Asian     | 0                           | 0.137                   | 0.0407                  | 0.0175   | 0.0097   | -0.238    |
| 575 | Raemelton Farm | 2013 | Styrax obassia                         | Angiosperm     | Asian     | 0                           | 0                       | 0.0278                  | 0.0023   | 0.001    | -0.3684   |
| 576 | Raemelton Farm | 2013 | Syringa pekinensis Morton              | Angiosperm     | Asian     | 0.0159                      | 0.1667                  | 1.2302                  | 0.0082   | 0.0175   | 0.4072    |
| 577 | Raemelton Farm | 2013 | Syringa pekinensis Zhang Zhiming       | Angiosperm     | Asian     | 0                           | 0.5556                  | 4.6944                  | 0.0023   | 0.0058   | 0.4694    |
| 578 | Raemelton Farm | 2013 | Taxus x media Hicksii                  | Gymnosperm     | Hybrid    | 0                           | 0                       | 0                       | 0.0023   | 0        | -1        |
| 579 | Raemelton Farm | 2013 | Tetradium daniellii                    | Angiosperm     | Asian     | 0.0278                      | 1.1944                  | 0.0833                  | 0.0047   | 0.0107   | 0.4348    |
| 580 | Raemelton Farm | 2013 | Thuja plicata Atrovirens               | Gymnosperm     | Non Asian | 0                           | 0                       | 0                       | 0.0012   | 0        | -1        |
| 581 | Raemelton Farm | 2013 | Thuja plicata Emerald Cone             | Gymnosperm     | Non Asian | 0                           | 0                       | 0                       | 0.0023   | 0        | -1        |
| 582 | Raemelton Farm | 2013 | Thuja plicata Zebrina                  | Gymnosperm     | Non Asian | 0                           | 0                       | 0                       | 0.0023   | 0        | -1        |
| 583 | Raemelton Farm | 2013 | Thuja standishii x plicata Green Giant | Gymnosperm     | Hybrid    | 0                           | 0                       | 0.0741                  | 0.0035   | 0.0019   | -0.238    |
| 584 | Raemelton Farm | 2013 | Tilia cordata Greenspire               | Angiosperm     | Non Asian | 0.0123                      | 0.7593                  | 0.1049                  | 0.0105   | 0.0165   | 0.2711    |
| 585 | Raemelton Farm | 2013 | Tilia tomentosa Sterling               | Angiosperm     | Non Asian | 0.0159                      | 1.8889                  | 0.2302                  | 0.0082   | 0.0165   | 0.3831    |
| 586 | Raemelton Farm | 2013 | Tsuga canadensis Pendula               | Gymnosperm     | Non Asian | 0                           | 0                       | 0                       | 0.0012   | 0        | -1        |
| 587 | Raemelton Farm | 2013 | Ulmus americana Princeton              | Angiosperm     | Non Asian | 0.0222                      | 0.7222                  | 0.1778                  | 0.0117   | 0.0194   | 0.2974    |
| 588 | Raemelton Farm | 2013 | Ulmus americana Valley Forge           | Angiosperm     | Non Asian | 0.0556                      | 0.7361                  | 0.3056                  | 0.0047   | 0.0107   | 0.4348    |

|     | Site           | Year | Plant Taxon                                 | Classification | Origin    | Egg masses per 1 min survey | Nymphs per 1 min survey | Adults per 1 min survey | p      | r      | E*      |
|-----|----------------|------|---------------------------------------------|----------------|-----------|-----------------------------|-------------------------|-------------------------|--------|--------|---------|
| 589 | Raemelton Farm | 2013 | Ulmus parvifolia Emer I                     | Angiosperm     | Asian     | 0                           | 0                       | 0                       | 0.0012 | 0      | -1      |
| 590 | Raemelton Farm | 2013 | Ulmus parvifolia Emer II                    | Angiosperm     | Asian     | 0                           | 0.3111                  | 0                       | 0.0058 | 0.001  | -0.6883 |
| 591 | Raemelton Farm | 2013 | Xanthoceras sorbifolia                      | Angiosperm     | Asian     | 0                           | 0.1019                  | 0.0278                  | 0.007  | 0.0058 | -0.0399 |
| 592 | Ruppert East   | 2013 | Acer rubrum October Glory                   | Angiosperm     | Non Asian | 0.0069                      | 2.3125                  | 0                       | 0.063  | 0.1066 | 0.2717  |
| 593 | Ruppert East   | 2013 | Acer saccharum Commemoration                | Angiosperm     | Non Asian | 0.0278                      | 0.7222                  | 0                       | 0.0157 | 0.0203 | 0.1418  |
| 594 | Ruppert East   | 2013 | Acer saccharum Green Mountain               | Angiosperm     | Non Asian | 0.0093                      | 1.0972                  | 0.0602                  | 0.0945 | 0.1066 | 0.0758  |
| 595 | Ruppert East   | 2013 | Acer saccharum Legacy                       | Angiosperm     | Non Asian | 0.025                       | 0.6667                  | 0.0083                  | 0.0525 | 0.0609 | 0.0898  |
| 596 | Ruppert East   | 2013 | Amelanchier x grandiflora Autumn Brilliance | Angiosperm     | Non Asian | 0.0324                      | 1.9491                  | 0                       | 0.0945 | 0.1624 | 0.279   |
| 597 | Ruppert East   | 2013 | Betula nigra Heritage                       | Angiosperm     | Non Asian | 0.0556                      | 0.75                    | 0                       | 0.0157 | 0.0203 | 0.1418  |
| 598 | Ruppert East   | 2013 | Carpinus betulus Fastigiata                 | Angiosperm     | Non Asian | 0.0208                      | 1.75                    | 0                       | 0.063  | 0.0609 | -0.0011 |
| 599 | Ruppert East   | 2013 | Cercis canadensis                           | Angiosperm     | Non Asian | 0.0556                      | 2.4444                  | 0                       | 0.0315 | 0.0508 | 0.249   |
| 600 | Ruppert East   | 2013 | Crataegus viridis Winter King               | Angiosperm     | Non Asian | 0                           | 0.5185                  | 0                       | 0.0236 | 0.0203 | -0.0599 |
| 601 | Ruppert East   | 2013 | Gleditsia triacanthos Shademaster           | Angiosperm     | Non Asian | 0.0238                      | 0.754                   | 0.0238                  | 0.0551 | 0.0761 | 0.1754  |
| 602 | Ruppert East   | 2013 | Koelreuteria paniculata                     | Angiosperm     | Asian     | 0                           | 1.1111                  | 0                       | 0.0157 | 0.0254 | 0.249   |
| 603 | Ruppert East   | 2013 | Malus Adams                                 | Angiosperm     | unknown   | 0.0278                      | 1.2222                  | 0                       | 0.0315 | 0.0254 | -0.092  |
| 604 | Ruppert East   | 2013 | Malus Prairifire                            | Angiosperm     | unknown   | 0                           | 1.2361                  | 0                       | 0.0315 | 0.0558 | 0.2931  |
| 605 | Ruppert East   | 2013 | Malus Spring Snow                           | Angiosperm     | unknown   | 0                           | 0.8333                  | 0                       | 0.0157 | 0.0152 | -0.0011 |
| 606 | Ruppert East   | 2013 | Malus x zumi Calocarpa                      | Angiosperm     | Asian     | 0                           | 1.0139                  | 0                       | 0.0315 | 0.0305 | -0.0011 |
| 607 | Ruppert East   | 2013 | Picea abies                                 | Gymnosperm     | Non Asian | 0                           | 0                       | 0                       | 0.063  | 0      | -1      |
| 608 | Ruppert East   | 2013 | Prunus serrulata Kwanzan                    | Angiosperm     | Asian     | 0                           | 1.6111                  | 0                       | 0.0079 | 0.0102 | 0.1418  |
| 609 | Ruppert East   | 2013 | Quercus acutissima                          | Angiosperm     | Asian     | 0                           | 0.5556                  | 0                       | 0.0236 | 0.0152 | -0.2011 |
| 610 | Ruppert East   | 2013 | Styrax japonicus                            | Angiosperm     | Asian     | 0                           | 0                       | 0                       | 0.0079 | 0      | -1      |
| 611 | Ruppert East   | 2013 | Thuja occidentalis Smaragd                  | Gymnosperm     | Non Asian | 0                           | 0.0139                  | 0                       | 0.0315 | 0.0051 | -0.7148 |
| 612 | Ruppert East   | 2013 | Thuja standishii x plicata Green Giant      | Gymnosperm     | Hybrid    | 0                           | 0.197                   | 0.0076                  | 0.0577 | 0.0254 | -0.3759 |
| 613 | Ruppert East   | 2013 | Tilia cordata Greenspire                    | Angiosperm     | Non Asian | 0                           | 0.2917                  | 0.0139                  | 0.0315 | 0.0305 | -0.0011 |
| 614 | Ruppert East   | 2013 | Ulmus parvifolia Dynasty                    | Angiosperm     | Asian     | 0                           | 0.0278                  | 0                       | 0.0157 | 0.0051 | -0.5008 |
| 615 | Ruppert East   | 2013 | Ulmus parvifolia Emer II                    | Angiosperm     | Asian     | 0.0278                      | 1.5556                  | 0                       | 0.0315 | 0.0203 | -0.2011 |
| 616 | Ruppert East   | 2013 | Zelkova serrata Village Green               | Angiosperm     | Asian     | 0.0046                      | 0.1481                  | 0                       | 0.0945 | 0.0508 | -0.2867 |
| 617 | Ruppert North  | 2013 | Acer rubrum Armstrong                       | Angiosperm     | Non Asian | 0.0347                      | 1.5069                  | 0.0278                  | 0.036  | 0.0603 | 0.2699  |
| 618 | Ruppert North  | 2013 | Acer rubrum Franksred                       | Angiosperm     | Non Asian | 0.0278                      | 1.2778                  | 0.0139                  | 0.1081 | 0.1055 | 0.0073  |
| 619 | Ruppert North  | 2013 | Acer rubrum October Glory                   | Angiosperm     | Non Asian | 0.0488                      | 1.9634                  | 0.0325                  | 0.0616 | 0.0905 | 0.2086  |
| 620 | Ruppert North  | 2013 | Acer rubrum Sun Valley                      | Angiosperm     | Non Asian | 0                           | 0.4444                  | 0                       | 0.009  | 0.0151 | 0.2699  |
| 621 | Ruppert North  | 2013 | Acer saccharum Commemoration                | Angiosperm     | Non Asian | 0.0278                      | 2.1667                  | 0                       | 0.009  | 0.0151 | 0.2699  |
| 622 | Ruppert North  | 2013 | Acer saccharum Green Mountain               | Angiosperm     | Non Asian | 0.0556                      | 0.9444                  | 0.0069                  | 0.036  | 0.0452 | 0.1321  |
| 623 | Ruppert North  | 2013 | Betula nigra BNMTF                          | Angiosperm     | Non Asian | 0                           | 0.75                    | 0.0139                  | 0.018  | 0.0101 | -0.266  |
| 624 | Ruppert North  | 2013 | Crataegus viridis Winter King               | Angiosperm     | Non Asian | 0.0278                      | 1.6019                  | 0.0185                  | 0.027  | 0.0377 | 0.1835  |
| 625 | Ruppert North  | 2013 | Cryptomeria japonica                        | Gymnosperm     | Asian     | 0                           | 0.0278                  | 0.0278                  | 0.009  | 0.0025 | -0.5505 |
| 626 | Ruppert North  | 2013 | Cryptomeria japonica Yoshino                | Gymnosperm     | Asian     | 0                           | 0                       | 0                       | 0.009  | 0      | -1      |
| 627 | Ruppert North  | 2013 | Cupressocyparis leylandii                   | Gymnosperm     | Non Asian | 0                           | 0.3542                  | 0.2083                  | 0.012  | 0.0151 | 0.1321  |
| 628 | Ruppert North  | 2013 | Gleditsia triacanthos Shademaster           | Angiosperm     | Non Asian | 0.0056                      | 0.4833                  | 0.0611                  | 0.045  | 0.0452 | 0.0213  |
| 629 | Ruppert North  | 2013 | Gleditsia triacanthos Skyline               | Angiosperm     | Non Asian | 0.0139                      | 0.5556                  | 0.0972                  | 0.036  | 0.0452 | 0.1321  |
| 630 | Ruppert North  | 2013 | Ilex x aquipernyi Meschick                  | Angiosperm     | Hybrid    | 0                           | 0.0333                  | 0.0111                  | 0.045  | 0.0176 | -0.4226 |



|     | Site          | Year | Plant Taxon                            | Classification | Origin    | Egg masses per 1 min survey | Nymphs per 1 min survey | Adults per 1 min survey | <i>p</i> | <i>r</i> | <i>E*</i> |
|-----|---------------|------|----------------------------------------|----------------|-----------|-----------------------------|-------------------------|-------------------------|----------|----------|-----------|
| 631 | Ruppert North | 2013 | Liquidambar styraciflua Cherokee       | Angiosperm     | Non Asian | 0.0139                      | 0.0972                  | 0.0139                  | 0.018    | 0.0101   | -0.266    |
| 632 | Ruppert North | 2013 | Malus Prairiefire                      | Angiosperm     | unknown   | 0.0556                      | 1.8333                  | 0                       | 0.009    | 0.0126   | 0.1835    |
| 633 | Ruppert North | 2013 | Ostrya virginiana                      | Angiosperm     | Non Asian | 0                           | 0.0556                  | 0.0278                  | 0.009    | 0.005    | -0.266    |
| 634 | Ruppert North | 2013 | Picea abies                            | Gymnosperm     | Non Asian | 0                           | 0                       | 0                       | 0.009    | 0        | -1        |
| 635 | Ruppert North | 2013 | Platanus x acerifolia Bloodgood        | Angiosperm     | Non Asian | 0.0156                      | 1.0111                  | 0.0511                  | 0.1126   | 0.1231   | 0.0638    |
| 636 | Ruppert North | 2013 | Prunus cerasifera Thundercloud         | Angiosperm     | Non Asian | 0.0278                      | 0.1667                  | 0.0278                  | 0.009    | 0.005    | -0.266    |
| 637 | Ruppert North | 2013 | Prunus sargentii                       | Angiosperm     | Asian     | 0.0278                      | 0.3333                  | 0.0833                  | 0.009    | 0.0126   | 0.1835    |
| 638 | Ruppert North | 2013 | Prunus serrulata Kwanzan               | Angiosperm     | Asian     | 0.0417                      | 0.3472                  | 0.2083                  | 0.018    | 0.0276   | 0.2291    |
| 639 | Ruppert North | 2013 | Prunus subhirtella Autumnalis          | Angiosperm     | Asian     | 0.0278                      | 1.5278                  | 0                       | 0.009    | 0.0126   | 0.1835    |
| 640 | Ruppert North | 2013 | Prunus subhirtella Pendula             | Angiosperm     | Asian     | 0                           | 0.2222                  | 0                       | 0.009    | 0.0075   | -0.0697   |
| 641 | Ruppert North | 2013 | Prunus x incam Okame                   | Angiosperm     | Asian     | 0.0139                      | 0.6528                  | 0.0556                  | 0.018    | 0.0126   | -0.1596   |
| 642 | Ruppert North | 2013 | Prunus x yedoensis                     | Angiosperm     | Asian     | 0.0486                      | 0.9375                  | 0.0625                  | 0.036    | 0.0352   | 0.0073    |
| 643 | Ruppert North | 2013 | Pyrus calleryana Cleveland Select      | Angiosperm     | Asian     | 0.0417                      | 0.9861                  | 0.0833                  | 0.018    | 0.0226   | 0.1321    |
| 644 | Ruppert North | 2013 | Quercus bicolor                        | Angiosperm     | Non Asian | 0                           | 0.0833                  | 0.0278                  | 0.009    | 0.0075   | -0.0697   |
| 645 | Ruppert North | 2013 | Quercus palustris Green Pillar         | Angiosperm     | Non Asian | 0.0139                      | 0.2639                  | 0.0139                  | 0.018    | 0.0075   | -0.3939   |
| 646 | Ruppert North | 2013 | Syringa reticulata Ivory Silk          | Angiosperm     | Asian     | 0.0278                      | 0.75                    | 0.0556                  | 0.009    | 0.0126   | 0.1835    |
| 647 | Ruppert North | 2013 | Thuja standishii x plicata Green Giant | Gymnosperm     | Hybrid    | 0                           | 0                       | 0.2167                  | 0.015    | 0.0176   | 0.0981    |
| 648 | Ruppert North | 2013 | Tilia americana Redmond                | Angiosperm     | Non Asian | 0                           | 0.0139                  | 0                       | 0.018    | 0.0025   | -0.7468   |
| 649 | Ruppert North | 2013 | Tilia cordata Greenspire               | Angiosperm     | Non Asian | 0.0222                      | 0.2889                  | 0.0056                  | 0.045    | 0.0302   | -0.1794   |
| 650 | Ruppert North | 2013 | Tilia tomentosa Sterling               | Angiosperm     | Non Asian | 0.1026                      | 2.9872                  | 0.0641                  | 0.0195   | 0.0276   | 0.1909    |
| 651 | Ruppert North | 2013 | Ulmus americana Princeton              | Angiosperm     | Non Asian | 0                           | 0.1667                  | 0.0278                  | 0.009    | 0.005    | -0.266    |
| 652 | Ruppert North | 2013 | Ulmus parvifolia Dynasty               | Angiosperm     | Asian     | 0                           | 1.0556                  | 0.0833                  | 0.009    | 0.0075   | -0.0697   |
| 653 | Ruppert North | 2013 | Ulmus Patriot                          | Angiosperm     | Hybrid    | 0.0278                      | 2.6944                  | 0.0278                  | 0.009    | 0.0126   | 0.1835    |
| 654 | Ruppert North | 2013 | Zelkova serrata Green Vase             | Angiosperm     | Asian     | 0.0123                      | 0.0494                  | 0                       | 0.0405   | 0.0226   | -0.266    |
| 655 | Ruppert North | 2013 | Zelkova serrata Village Green          | Angiosperm     | Asian     | 0.0602                      | 0.6343                  | 0.0139                  | 0.0541   | 0.0553   | 0.0305    |
